# Supplementary material for: Corroboration of Zn(ii)–Mg(ii)-tertiary structure interplays essential for the optimal catalysis of a phosphorothiolate thiolesterase ribozyme
Source: Royal Society of Chemistry journal article supplement (doi:10.1039/c8ra05083j), 2018-01-01
Supplement: c8ra05083j1.pdf [file c8ra05083j1.pdf]

## Electronic Supplementary Information (ESI)

**Corroboration of Zn(II)-Mg(II)-tertiary structure interplays essential to optimal**

**catalysis of a phosphorothiolate thiolesterase ribozyme**

Tzu-Pin Wang,<sup>\*,a, b</sup> Yu-Chih Su,<sup>a,e</sup> Yi Chen,<sup>a,e</sup> Scott Severance,<sup>c</sup> Chi-Ching Hwang,<sup>d</sup>

Yi-Ming Liou,<sup>a</sup> Chia-Hui Lu,<sup>a</sup> Kun-Liang Lin,<sup>a</sup> Rui Jing Zhu<sup>a</sup> and Eng-Chi Wang<sup>a</sup>

<sup>a</sup>*Department of Medicinal and Applied Chemistry,* <sup>d</sup>*Department of Biochemistry, and*

<sup>b</sup>*Kaohsiung Medical University Hospital, Kaohsiung Medical University, Kaohsiung,*

*80708, Taiwan;* <sup>c</sup>*Department of Molecular and Cellular Sciences, Liberty University*

*College of Osteopathic Medicine, Lynchburg, Va 24515, USA.*

\*Corresponding author: [tzupinw@kmu.edu.tw](mailto:tzupinw@kmu.edu.tw)

<sup>e</sup>Authors contributed equally to this study.

\*Contact address: Department of Medicinal and Applied Chemistry, Kaohsiung

Medical University, Kaohsiung, 80708, Taiwan

Tel: +886-07-312-1101, ext. 2756, Fax: +886-07-312-5339

Keywords: ribozyme, phosphorothiolate thiolesterase, zinc, magnesium, kinetics,

GNRA tetraloop

Running title: Divalent metal ions essential to phosphorothiolate thiolesterase RNA

catalysis

**Contents**

|                                                                                                   |         |
|---------------------------------------------------------------------------------------------------|---------|
| 1. Figs. S1-S6 .....                                                                              | S3-S10  |
| 2. Tables. S1-S4 .....                                                                            | S11-S15 |
| 3. $^1\text{H}$ , $^{13}\text{C}$ and $^{31}\text{P}$ NMR, and HRMS Spectra of New Compounds..... | S16-S57 |

## Supplemental Figures

(A)

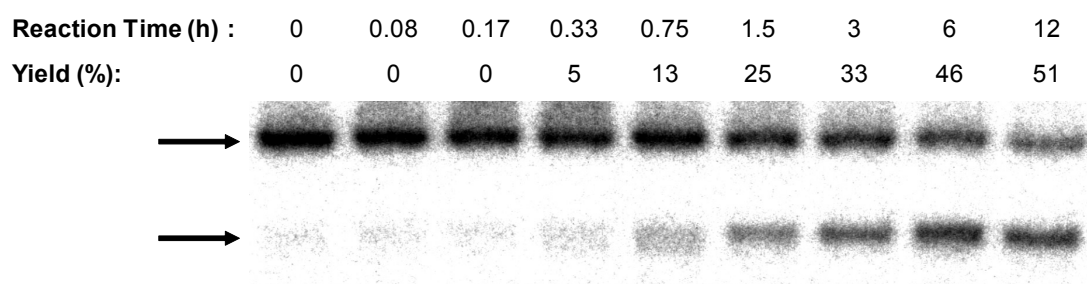

(B)

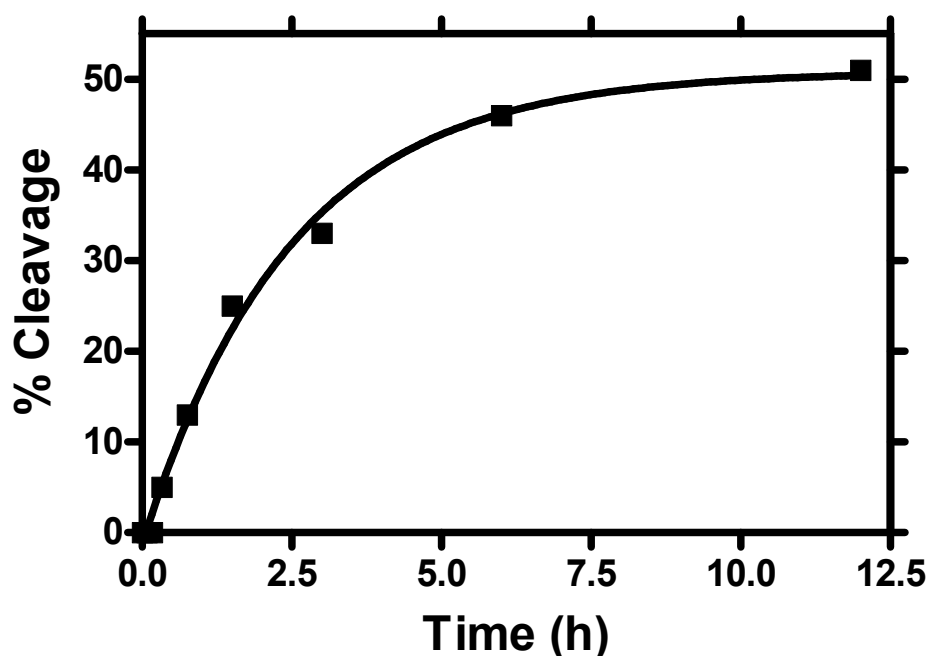

**Fig. S1.** Kinetics of TW17 ribozyme catalysis in the presence of 0.5 mM  $Zn^{2+}$  only. (A) Time-course study of catalysis for the  $^{32}P$ -labeled GMPS-primed TW17 ribozyme previously conjugated with **18a**. The reaction products from each time point were separated by SA $\nu$  gel shift assay in 8% urea-PAGE, and analyzed by an Amersham Typhoon PhosphorImager system. The top arrow indicates the location of the SA $\nu$ -retarded  $^{32}P$ -labeled TW17 ribozyme-**18a** conjugate; the bottom arrow represents the migration of the  $^{32}P$ -labeled TW17 ribozyme-catalyzed reaction product. (B) Determination of the pseudo-first-order rate constant  $k_{obs}$  for the TW17 ribozyme catalysis in the presence of 0.5 mM  $Zn^{2+}$  only. Data obtained from the ImageQuant software analysis in Figure S1A were fitted into a single-exponential equation for the first-order kinetics,  $F(t) = F_0 + F_{max}(1 - e^{-k_{obs}t})$  [ $F(t)$ , percent cleavage of the reactant at a

specific time point  $t$ ; GraphPad, La Jolla, CA, USA), to obtain the pseudo first-order rate constant  $k_{\text{obs}} = 0.005 \text{ min}^{-1}$  for TW17 ribozyme catalysis.

|                                                            |   |    |   |    |   |   |   |    |
|------------------------------------------------------------|---|----|---|----|---|---|---|----|
| Lane:                                                      | 1 | 2  | 3 | 4  | 5 | 6 | 7 | 8  |
| Mg <sup>2+</sup> (100 mM):                                 | + | +  | - | -  | - | - | - | -  |
| Zn <sup>2+</sup> (0.5 mM):                                 | + | +  | + | +  | - | - | + | +  |
| [Co(NH <sub>3</sub> ) <sub>6</sub> ] <sup>3+</sup> (50 μM) | - | -  | - | -  | + | + | + | +  |
| Reaction Time (h):                                         | 0 | 3  | 0 | 3  | 0 | 3 | 0 | 3  |
| Yield (%):                                                 | 0 | 44 | 0 | 33 | 0 | 0 | 0 | 38 |

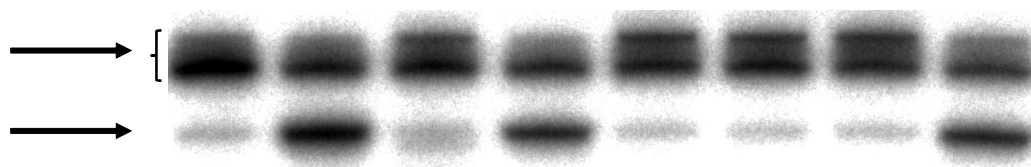

**Fig. S2.** Outer-sphere and inner-sphere Mg<sup>2+</sup> all required for optimal TW17 ribozyme catalysis. The <sup>32</sup>P-body-labeled GMPS-primed TW17 RNA previously conjugated with **18a** catalyzed each reaction in the presence of specified metal ions. Reaction products were separated by streptavidin (SAv) gel shift assay in 8% urea-PAGE and analyzed by an Amersham Typhoon PhosphorImager system. The top arrow in the figure indicates the location of the SAv-retarded <sup>32</sup>P-labeled TW17 ribozyme-**18a** conjugate; the bottom arrow represents the migration of the <sup>32</sup>P-labeled TW17 ribozyme-catalyzed reaction product. The presence of doublet signals in the region indicated by the top arrow was the result of either one (lower band) or at least two (upper band) TW17 ribozyme-**18a** conjugates adsorbed onto an SAv molecule during the SAv gel shift assay due to significant excess of the TW17 ribozyme-**18a** conjugates in the samples.



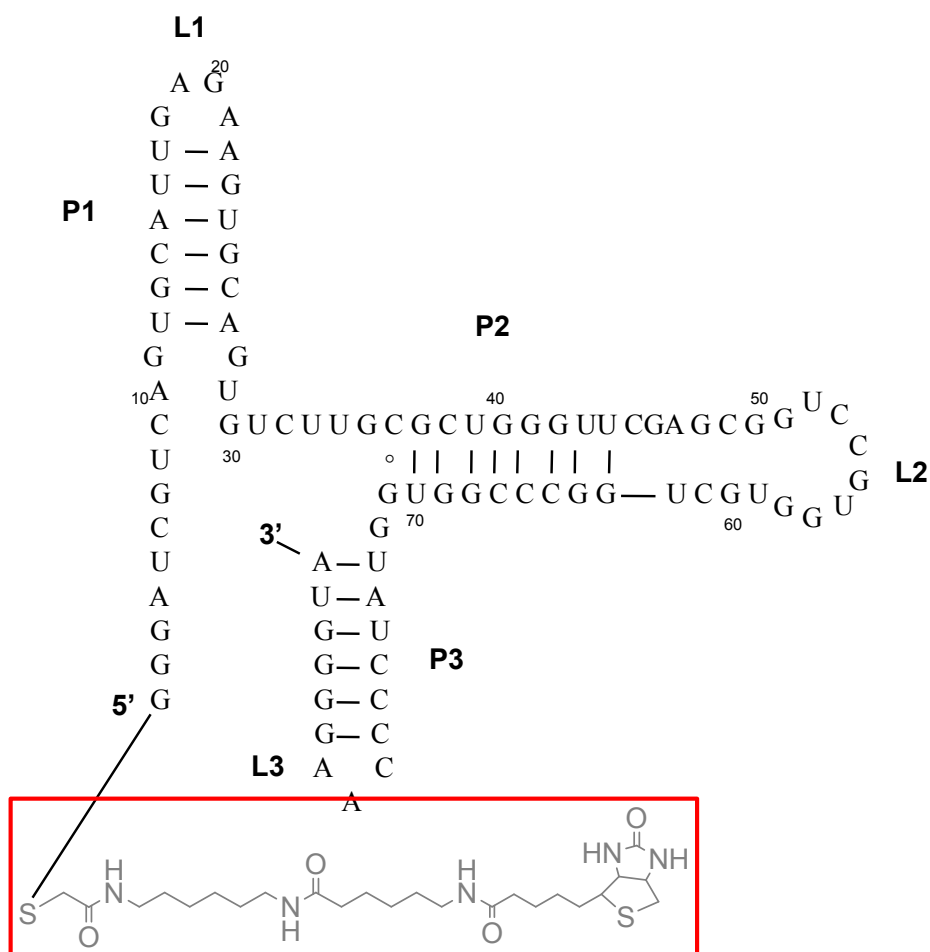

**Figure S4.** The secondary structure for the cis-acting GMPS-primed TW17 ribozyme when covalently linked to the substrate **18a** (gray color highlighted by a red-color box).

**(A)**

| Reaction Time (min): | 0 | 5  | 10 | 20 | 45 | 90 | 180 |
|----------------------|---|----|----|----|----|----|-----|
| Yield (%):           | 3 | 12 | 14 | 20 | 31 | 37 | 43  |

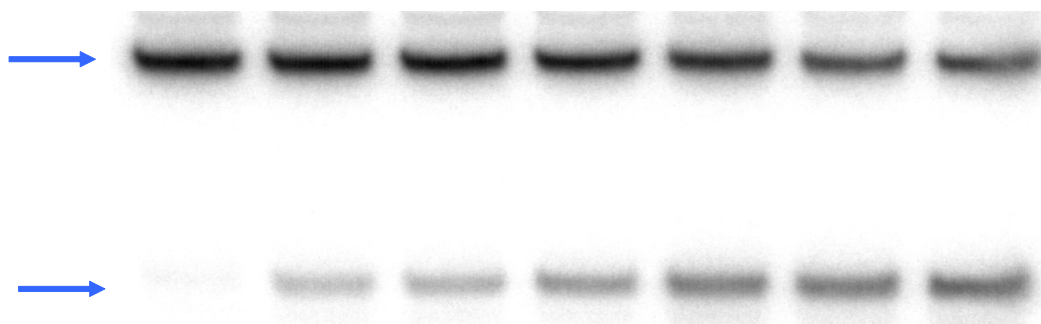

(B)

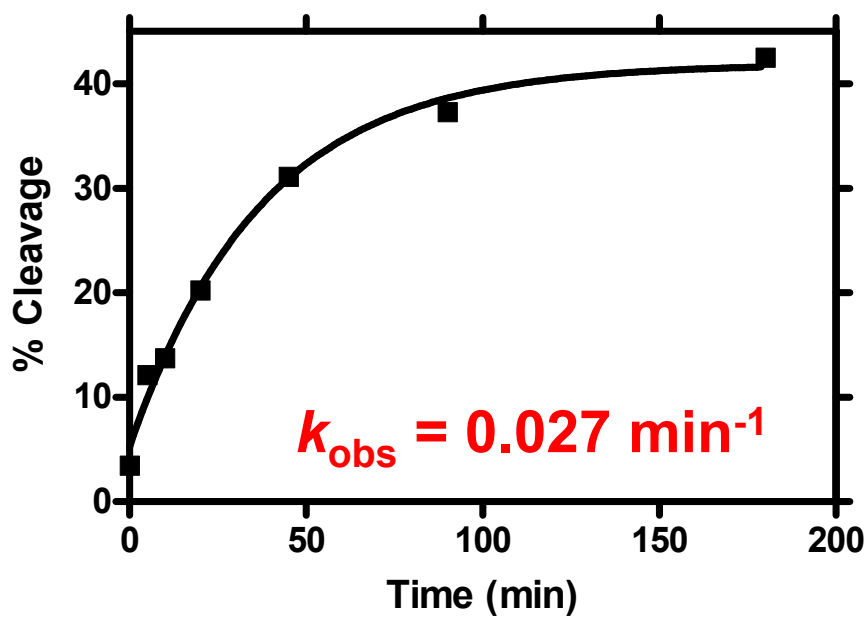

(C)

|                      |   |   |    |    |    |    |     |
|----------------------|---|---|----|----|----|----|-----|
| Reaction Time (min): | 0 | 5 | 10 | 20 | 45 | 90 | 180 |
| Yield (%):           | 2 | 6 | 18 | 38 | 54 | 57 | 65  |

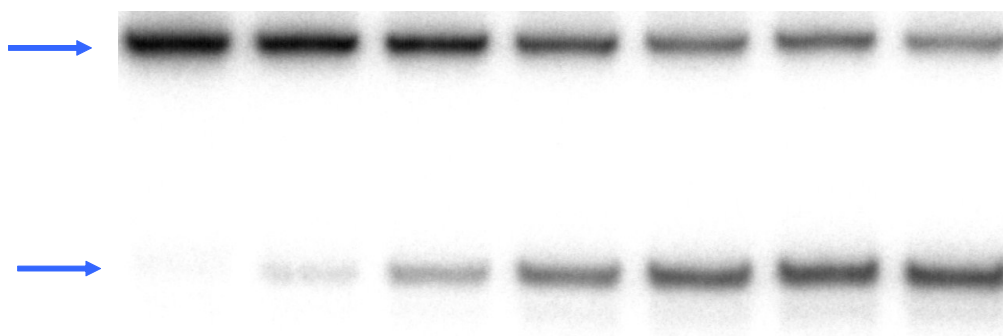

(D)

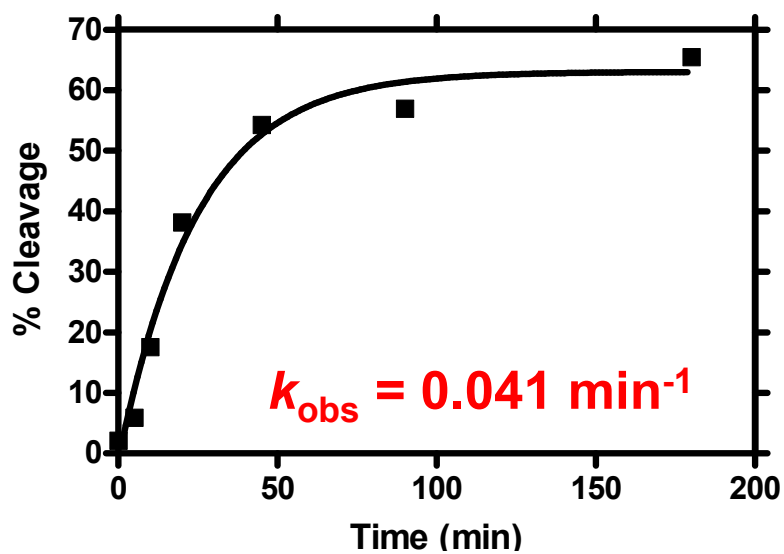

(E)

|                      |   |    |    |    |    |    |     |
|----------------------|---|----|----|----|----|----|-----|
| Reaction Time (min): | 0 | 5  | 10 | 20 | 45 | 90 | 180 |
| Yield (%):           | 3 | 13 | 14 | 18 | 26 | 31 | 34  |

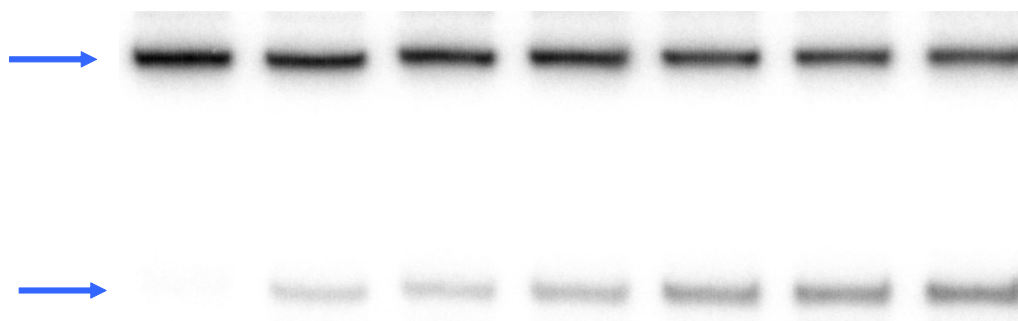

(F)

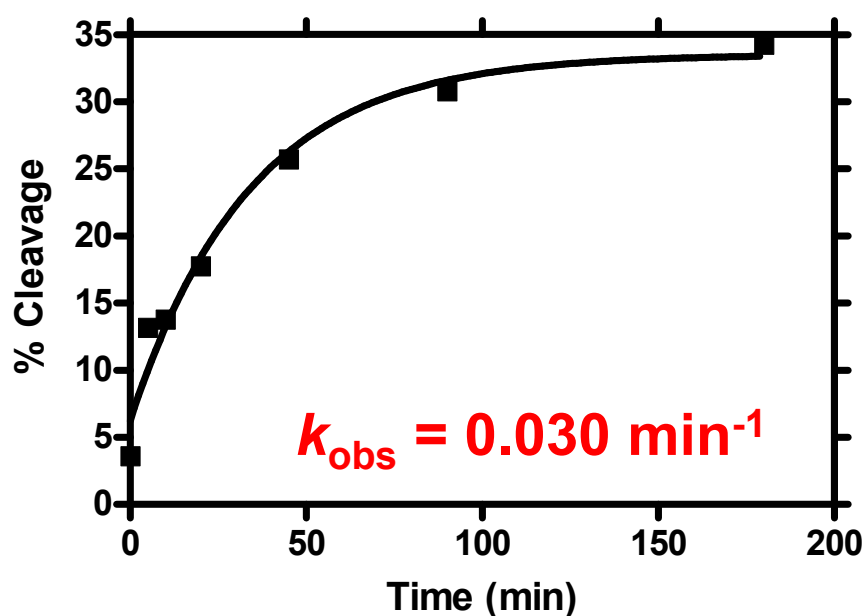

**Fig. S5.** *Cis*-acting TW17 ribozyme catalysis in the presence of metal concentrations different from those in the standard reaction condition ( $[\text{Zn}^{2+}] = 0.5 \text{ mM}$  and  $[\text{Mg}^{2+}] = 100 \text{ mM}$ ). Streptavidin (SAv) gel-shift assay in 10% urea-PAGE was employed to separate products of TW17 ribozyme catalysis when (A)  $[\text{Zn}^{2+}]$  was adjusted to 1.25 mM, (C)  $[\text{Mg}^{2+}]$  was changed to 37.5 mM, or (E) both  $[\text{Zn}^{2+}]$  and  $[\text{Mg}^{2+}]$  were adjusted to 1.25 mM and 37.5 mM, respectively. The images of (A), (C) and (E) were acquired from the analyses of an Amersham Typhoon PhosphorImager system. The top blue arrow in each image represents the location of the SAv-retarded  $^{32}\text{P}$ -labeled TW17 RNA-18a conjugate; the bottom blue arrow indicates the migration of the  $^{32}\text{P}$ -labeled TW17 ribozyme-catalyzed reaction product. Each data set obtained from the ImageQuant software analysis in Figures S5A, S5C or S5E was plotted as (B), (D) or (F) respectively, and fitted into a single-exponential equation for the first-order kinetics,  $F(t) = F_0 +$



$F_{\max}(1-e^{-k_{\text{obs}}t})$  [F(t), percent cleavage of the reactant at a specific time point  $t$ ; GraphPad, La Jolla, CA, USA), to afford the corresponding pseudo first-order rate constant  $k_{\text{obs}}$  of  $0.027 \text{ min}^{-1}$ ,  $0.041 \text{ min}^{-1}$  or  $0.030 \text{ min}^{-1}$  respectively for TW17 ribozyme catalysis.

(A)

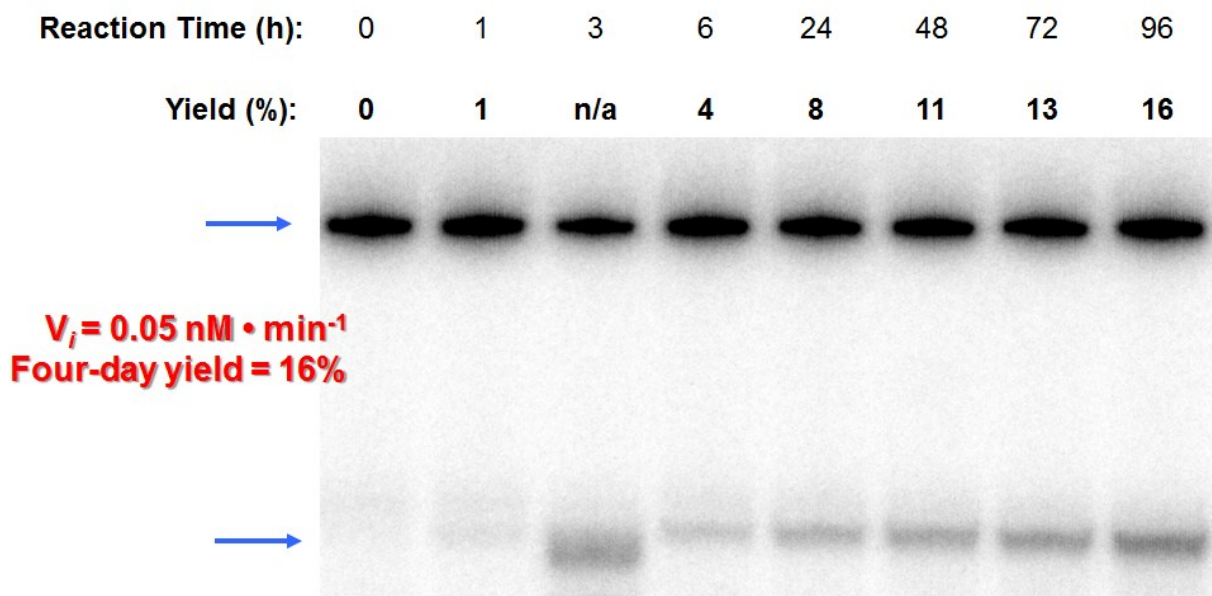

(B)

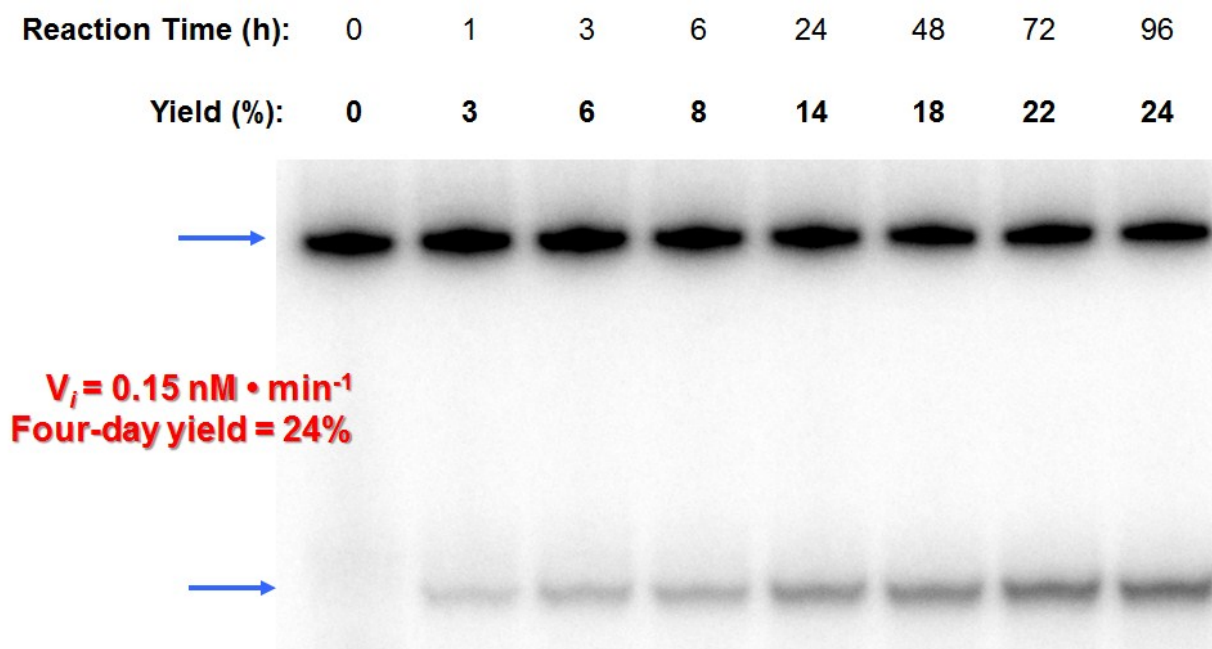

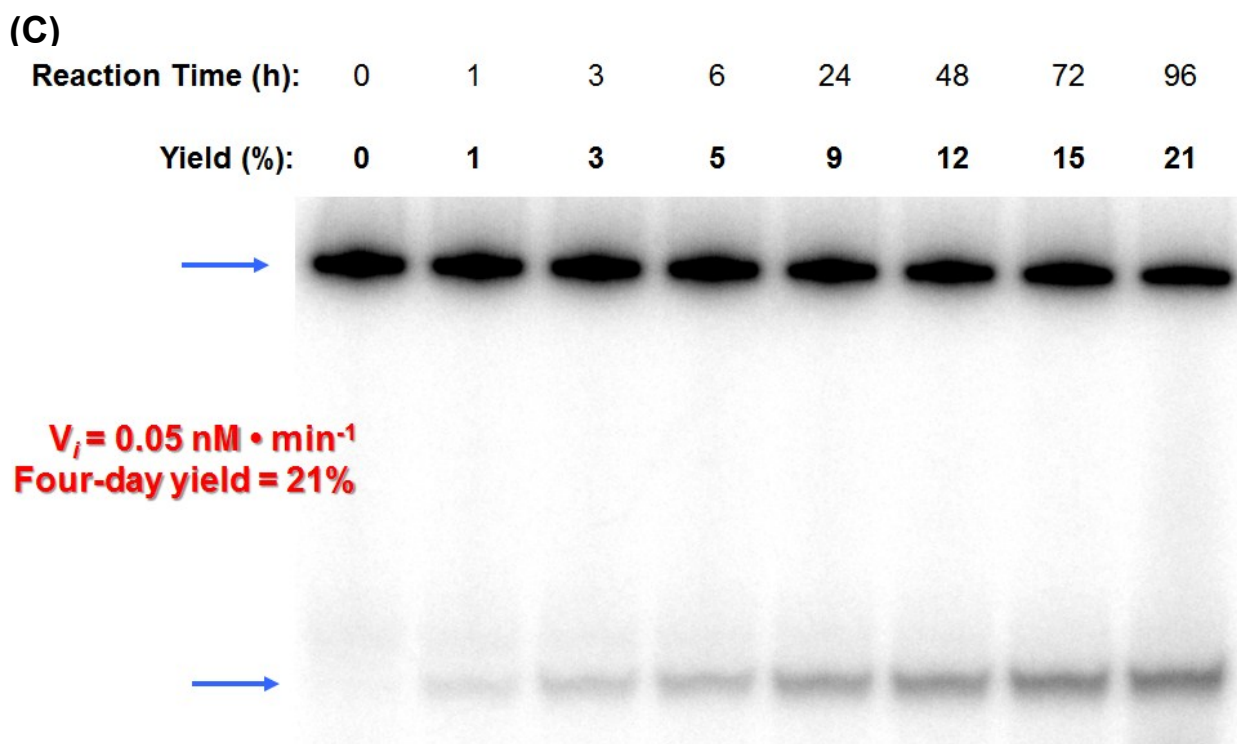

**Fig. S6.** Multiple substrate turnover of two *trans*-acting TW17 ribozyme systems in the presence of the optimal metal concentrations determined by the results of Figure S5 ( $[\text{Zn}^{2+}] = 0.5 \text{ mM}$  and  $[\text{Mg}^{2+}] = 37.5 \text{ mM}$ ) and of those in the standard reaction condition ( $[\text{Zn}^{2+}] = 0.5 \text{ mM}$  and  $[\text{Mg}^{2+}] = 100 \text{ mM}$ ). SA v gel-shift assay in 20% urea-PAGE was employed to separate catalytic products of two TW17 ribozyme systems: (A) and (C) of the TW17S<sub>1-29</sub> RNA-TW17C<sub>30-87</sub> RNA pair; (B) of the TW17S<sub>1-29</sub> RNA-TW17C-1 pair. Catalysis under multiple substrate turnover was attained by including 300 nM of the <sup>32</sup>P-labeled TW17S<sub>1-29</sub> RNA and 30 nM of TW17C<sub>30-87</sub> RNA/TW17C-1 RNA in the reactions. In addition, the TW17 ribozyme systems in (A) and (B) performed catalysis in the presence of 0.5 mM of Zn<sup>2+</sup> and 100 mM of Mg<sup>2+</sup>. On the other hand, TW17 ribozyme catalysis in (C) was carried out in the presence of 0.5 mM of Zn<sup>2+</sup> and 37.5 mM of Mg<sup>2+</sup>. All images were acquired from the analyses of an Amersham Typhoon PhosphorImager system and were quantified by the ImageQuant software. The top blue arrow in each image represents the location of the SA v-retarded <sup>32</sup>P-labeled TW17S<sub>1-29</sub> RNA-**18a** conjugate; the bottom blue arrow indicates the migration of the <sup>32</sup>P-labeled TW17 ribozyme-catalyzed reaction product. The initial velocities ( $v_i$ ) were determined by measuring the slope of the time-course curve from 0 to 1 h in each reaction.

## Supplemental Tables

**Table S1.** Procedures for construction of the *trans*-acting TW17 ribozyme systems.

| <b>Biomolecular<br/><i>trans</i>-acting<br/>TW17 ribozyme<br/>systems</b> | <b>Synthesis of the 5' fragment<br/>RNAs</b>                                                                                                                                                                                                                                                                                                       | <b>Synthesis of the catalytic core<br/>RNAs</b>                                                                                                                                                                                                                                                                                                                                                                                                                                                                                         |
|---------------------------------------------------------------------------|----------------------------------------------------------------------------------------------------------------------------------------------------------------------------------------------------------------------------------------------------------------------------------------------------------------------------------------------------|-----------------------------------------------------------------------------------------------------------------------------------------------------------------------------------------------------------------------------------------------------------------------------------------------------------------------------------------------------------------------------------------------------------------------------------------------------------------------------------------------------------------------------------------|
| TW17S-1 RNA +<br>TW17C-1 RNA                                              | <b>TW17S-1 RNA:</b> The DNA was acquired by a PCR reaction using Primer TC-20 as the template, and the shortened Normal 5'-primer and Primer TC-21 as the primer pair. The afforded DNA was <i>in vitro</i> transcribed by T7 RNA polymerase. {Wang, 2012 #527}                                                                                    | <b>TW17C-1 RNA:</b> The DNA was acquired by an extension reaction between Primer TC-2 and Primer TC-3, then a PCR reaction using the extension reaction product as the template, and Primer TC-2 and the normal 3' -35 primer as the primer pair. The afforded DNA was <i>in vitro</i> transcribed by T7 RNA polymerase. {Wang, 2012 #527}                                                                                                                                                                                              |
| TW17S-2 RNA +<br>TW17C-2 RNA                                              | <b>TW17S-2 RNA:</b> The DNA was acquired by a PCR reaction using the modified 5'-primer as the template, and the shortened Normal 5'-primer and Primer TC-4 as the primer pair. The afforded DNA was <i>in vitro</i> transcribed by T7 RNA polymerase. {Wang, 2012 #527}                                                                           | <b>TW17C-2 RNA:</b> The DNA was acquired by a 1 <sup>st</sup> extension reaction between Primer TC-6 and Primer TC-11, a 2 <sup>nd</sup> extension reaction using the 1 <sup>st</sup> extension reaction product as the template and Primer TC-11 and the normal 3' -35 primer as the primer pair, then a PCR reaction using the extension reaction product as the template, and Primer TC-11 and the normal 3' -35 primer as the primer pair. The afforded DNA was <i>in vitro</i> transcribed by T7 RNA polymerase. {Wang, 2012 #527} |
| TW17S-3 RNA +<br>TW17C-3 RNA                                              | <b>TW17S-3 RNA:</b> The DNA was acquired by an extension reaction between Primer TC-9 and Primer TC-10, then a PCR reaction using the extension reaction product as the template, and the shortened Normal 5'-primer and Primer TC-10 as the primer pair. The afforded DNA was <i>in vitro</i> transcribed by T7 RNA polymerase. {Wang, 2012 #527} | <b>TW17C-3 RNA:</b> The DNA was acquired by an extension reaction between Primer TC-6 and Primer TC-8, then a PCR reaction using the extension reaction product as the template, and the shortened normal 5'-primer and the normal 3' -35 primer as the primer pair. The afforded DNA was <i>in vitro</i> transcribed by T7 RNA polymerase. {Wang, 2012 #527}                                                                                                                                                                           |
| TW17S-4 RNA +<br>TW17C-4 RNA                                              | <b>TW17S-4 RNA:</b> The DNA was acquired by a PCR reaction using Primer TC-12 as the template, and the shortened Normal 5'-primer and Primer TC-13 as the primer pair. The afforded DNA was <i>in vitro</i> transcribed by T7 RNA polymerase. {Wang, 2012 #527}                                                                                    | <b>TW17C-4 RNA:</b> The DNA was acquired by an extension reaction between Primer TC-6 and Primer TC-14, then a PCR reaction using the extension reaction product as the template, and the shortened normal 5'-primer and the normal 3' -35 primer as the primer pair. The afforded DNA was <i>in vitro</i> transcribed by T7 RNA polymerase. {Wang, 2012 #527}                                                                                                                                                                          |

|                                                             |                                                                                                                                                                                                                                                                                                                                                                 |                                                                                                                                                                                                                                                                                                                                                                                                                                                                                                                                                                                            |
|-------------------------------------------------------------|-----------------------------------------------------------------------------------------------------------------------------------------------------------------------------------------------------------------------------------------------------------------------------------------------------------------------------------------------------------------|--------------------------------------------------------------------------------------------------------------------------------------------------------------------------------------------------------------------------------------------------------------------------------------------------------------------------------------------------------------------------------------------------------------------------------------------------------------------------------------------------------------------------------------------------------------------------------------------|
| <b>TW17S-5 RNA + TW17C-5 RNA</b>                            | <b>TW17S-5 RNA:</b> The DNA was acquired by a PCR reaction using Primer TC-15 as the template, and the shortened Normal 5'-primer and Primer TC-16 as the primer pair. The afforded DNA was <i>in vitro</i> transcribed by T7 RNA polymerase. {Wang, 2012 #527}                                                                                                 | <b>TW17C-5 RNA:</b> The DNA was acquired by a 1 <sup>st</sup> extension reaction between Primer TC-6 and Primer TC-17, a 2 <sup>nd</sup> extension reaction using the 1 <sup>st</sup> extension reaction product as the template and the shortened normal 5'-primer and the normal 3' -35 primer as the primer pair, then a PCR reaction using the extension reaction product as the template, and the shortened normal 5'-primer and the normal 3' -35 primer as the primer pair. The afforded DNA was <i>in vitro</i> transcribed by T7 RNA polymerase. {Wang, 2012 #527}                |
| <b>TW17S-6 RNA + TW17C-5 RNA</b>                            | <b>TW17S-6 RNA:</b> The DNA was acquired by a PCR reaction using Primer TC-18 as the template, and the shortened Normal 5'-primer and Primer TC-19 as the primer pair. The afforded DNA was <i>in vitro</i> transcribed by T7 RNA polymerase. {Wang, 2012 #527}                                                                                                 | <b>TW17C-5 RNA:</b> the same as the above.                                                                                                                                                                                                                                                                                                                                                                                                                                                                                                                                                 |
| <b>TW17S-1 RNA + TW17C-5 RNA</b>                            | <b>TW17S-1 RNA:</b> the same as the above                                                                                                                                                                                                                                                                                                                       | <b>TW17C-5 RNA:</b> the same as the above.                                                                                                                                                                                                                                                                                                                                                                                                                                                                                                                                                 |
| <b>TW17S-2 RNA + TW17C-3 RNA</b>                            | <b>TW17S-2 RNA:</b> the same as the above                                                                                                                                                                                                                                                                                                                       | <b>TW17C-3 RNA:</b> the same as the above.                                                                                                                                                                                                                                                                                                                                                                                                                                                                                                                                                 |
| <b>TW17S<sub>1-29</sub> RNA + TW17C<sub>30-87</sub> RNA</b> | <b>TW17S<sub>1-29</sub> RNA:</b> The DNA was acquired by an extension reaction between Primer TC-9 and Primer TC-22, then a PCR reaction using the extension reaction product as the template, and the shortened Normal 5'-primer and Primer TC-22 as the primer pair. The afforded DNA was <i>in vitro</i> transcribed by T7 RNA polymerase. {Wang, 2012 #527} | <b>TW17C<sub>30-87</sub> RNA:</b> The DNA was acquired by a 1 <sup>st</sup> extension reaction between Primer TC-23 and Primer TC-24, a 2 <sup>nd</sup> extension reaction using the 1 <sup>st</sup> extension reaction product as the template and the shortened normal 5'-primer and the normal 3' -35 primer as the primer pair, then a PCR reaction using the extension reaction product as the template, and the shortened normal 5'-primer and the normal 3' -35 primer as the primer pair. The afforded DNA was <i>in vitro</i> transcribed by T7 RNA polymerase. {Wang, 2012 #527} |
| <b>TW17S<sub>1-29</sub> RNA + TW17C-1 RNA</b>               | <b>TW17S<sub>1-29</sub> RNA:</b> the same as the above                                                                                                                                                                                                                                                                                                          | <b>TW17C-1 RNA:</b> The synthesis was reported previously. {Wang, 2012 #527}                                                                                                                                                                                                                                                                                                                                                                                                                                                                                                               |

**Table S2.** Sequences of the primers for construction of the *trans*-acting TW17 ribozyme systems.

| <b>Primer name</b> | <b>Primer sequence</b> |
|--------------------|------------------------|
|--------------------|------------------------|

|                            |                                                                 |
|----------------------------|-----------------------------------------------------------------|
| Shortened Normal 5' primer | 5'-GGTAACACGCATATGTAATACG-3'                                    |
| Normal 3'-35 primer        | 5'-ACCCCTGGGGATACCACCGGGCCAGCACCACGGA-3'                        |
| Modified 5'- primer        | 5'-<br>AACACGCATATGTAATACGACTCACTATAGGGATCGTCAGTGCATT<br>GAG-3' |
| Primer TC-2                | 5'-<br>AACACGCATATGTAATAGGACTCACTATAAGTGCAGTGTCTTGCGC<br>TG-3'  |
| Primer TC-3                | 5'-CACCGGGCCAGCACCACGGACCGCTCGAACCCAGCGCAAGAC-<br>3'            |
| Primer TC-4                | 5'-TCTCAATGCACTGACGATCC-3'                                      |
| Primer TC-6                | 5'-<br>CACCGGGCCAGCACCACGGACCGCTCGAACCCAGCGCAAGACT<br>GCAC-3'   |
| Primer TC-8                | 5'-<br>CACGCATATGTAATACGACTCACTATAGGGTGTCAGTGCAGTGTCT<br>TGC-3' |
| Primer TC-9                | 5'-GGTAACACGCATATGTAATACGACTCACTATAGGGATCGTC-3'                 |
| Primer TC-10               | 5'-GGGTCTCAATGCACTGACGATCCCTATAGTGAGTCG-3'                      |
| Primer TC-11               | 5'-<br>AACACGCATATGTAATACGACTCACTATAGTCTCAGTGCAGTGTCT<br>TGC-3' |
| Primer TC-13               | 5'-GGAATGCACTGACGATCCC-3'                                       |
| Primer TC-14               | 5'-<br>AACACGCATATGTAATACGACTCACTATAGGAGTGCAGTGTCTTGC<br>GC-3'  |
| Primer TC-15               | 5'-<br>AACACGCATATGTAATACGACTCACTATAGGGATCGTCAGTGCAC<br>C-3'    |
| Primer TC-16               | 5'-GGTGCCTGACGATCCC-3'                                          |
| Primer TC-17               | 5'-<br>AACACGCATATGTAATACGACTCACTATAGGTGCAGTGTCTTGCGC<br>TGG-3' |
| Primer TC-18               | 5'-<br>AACACGCATATGTAATACGACTCACTATAGGGATCGTCAGTGCATC<br>-3'    |

|              |                                                                      |
|--------------|----------------------------------------------------------------------|
| Primer TC-19 | 5'-GATGCACTGACGATCCC-3'                                              |
| Primer TC-20 | 5'AACACGCATATGTAATACGACTCACTATAGGGATCGTCGTGCAT<br>TG-3'              |
| Primer TC-21 | 5'-CAATGCACTGACGATCCC-3'                                             |
| Primer TC-22 | 5'-ACT GCA CTT CTC AAT GCA CTG ACG ATC CCT ATA GTG AGT<br>CG-3'      |
| Primer TC-23 | 5'-GGT AAC ACG CAT ATG TAA TAC GAC TCA CTA TAGT CTT GCG<br>CTG GG-3' |
| Primer TC-24 | 5'-CCG GGC CAG CAC CAC GGA CCG CTC GAA CCC AGC GCA AGA<br>CTA TAG-3' |

**Table S3.** Compositions of RNA solutions for the Langmuir isotherm analyses of *trans*-acting TW17 ribozyme systems. 4 X EK buffer: 400 mM EPPS, 4 M KCl, pH 7.5.

| <b>TW17S-X<br/>RNA:<br/>TW17C-<br/>Y RNA<br/>ratio</b> | <b>TW17S-X<br/>RNA<br/>solution<br/>volume<br/>(Stock<br/>solution<br/>conc.)</b> | <b>Zn<sup>2+</sup><br/>solution<br/>volume<br/>(Stock<br/>solution<br/>conc.)</b> | <b>4X EK<br/>buffer<br/>volume</b> | <b>DEPC<br/>water<br/>volume</b> | <b>TW17C-Y<br/>RNA<br/>solution<br/>volume<br/>(Stock<br/>solution<br/>conc.)</b> | <b>Mg<sup>2+</sup><br/>solution<br/>volume<br/>(Stock<br/>solution<br/>conc.)</b> | <b>4X EK<br/>buffer<br/>volume</b> | <b>DEPC<br/>water<br/>volume</b> |
|--------------------------------------------------------|-----------------------------------------------------------------------------------|-----------------------------------------------------------------------------------|------------------------------------|----------------------------------|-----------------------------------------------------------------------------------|-----------------------------------------------------------------------------------|------------------------------------|----------------------------------|
| <b>1:0</b>                                             | 0.5 µl<br>(1.13 µM)                                                               | 0.9 µl<br>(0.01 M)                                                                | 2 µl                               | 0.6 µl                           | 0 µl                                                                              | 0.188 µl<br>(2 M)                                                                 | 2 µl                               | 1.812<br>µl                      |
| <b>1:0.5</b>                                           | 0.5 µl<br>(1.13 µM)                                                               | 0.9 µl<br>(0.01 M)                                                                | 2 µl                               | 0.6 µl                           | 0.25 µl<br>(1.13 µM)                                                              | 0.188 µl<br>(2 M)                                                                 | 2 µl                               | 1.562<br>µl                      |
| <b>1:1</b>                                             | 0.5 µl<br>(1.13 µM)                                                               | 0.9 µl<br>(0.01 M)                                                                | 2 µl                               | 0.6 µl                           | 0.5 µl<br>(1.13 µM)                                                               | 0.188 µl<br>(2 M)                                                                 | 2 µl                               | 1.312<br>µl                      |
| <b>1:5</b>                                             | 0.5 µl<br>(1.13 µM)                                                               | 0.225 µl<br>(0.2 M)                                                               | 2 µl                               | 1.47 µl                          | 0.17 µl<br>(16.32 µM)                                                             | 0.924 µl<br>(2 M)                                                                 | 2 µl                               | 0.906<br>µl                      |
| <b>1:10</b>                                            | 0.5 µl<br>(1.13 µM)                                                               | 0.45 µl<br>(0.2 M)                                                                | 2 µl                               | 1.45 µl                          | 0.346 µl<br>(16.32 µM)                                                            | 1.232 µl<br>(3 M)                                                                 | 2 µl                               | 0.41 µl                          |

|             |                                |                        |           |              |                                  |                       |           |               |
|-------------|--------------------------------|------------------------|-----------|--------------|----------------------------------|-----------------------|-----------|---------------|
| <b>1:20</b> | 0.74 $\mu$ l<br>(1.13 $\mu$ M) | 0.09 $\mu$ l<br>(2 M)  | 3 $\mu$ l | 2.17 $\mu$ l | 0.341 $\mu$ l<br>(49.16 $\mu$ M) | 1.56 $\mu$ l<br>(3 M) | 3 $\mu$ l | 1.099 $\mu$ l |
| <b>1:25</b> | 0.74 $\mu$ l<br>(1.13 $\mu$ M) | 0.113 $\mu$ l<br>(2 M) | 3 $\mu$ l | 2.14 $\mu$ l | 0.427 $\mu$ l<br>(49.16 $\mu$ M) | 1.56 $\mu$ l<br>(3 M) | 3 $\mu$ l | 1.013 $\mu$ l |
| <b>1:40</b> | 0.74 $\mu$ l<br>(1.13 $\mu$ M) | 0.18 $\mu$ l<br>(2 M)  | 3 $\mu$ l | 2.08 $\mu$ l | 0.683 $\mu$ l<br>(49.16 $\mu$ M) | 1.56 $\mu$ l<br>(3 M) | 3 $\mu$ l | 0.757 $\mu$ l |
| <b>1:50</b> | 0.74 $\mu$ l<br>(1.13 $\mu$ M) | 0.225 $\mu$ l<br>(2 M) | 3 $\mu$ l | 2.03 $\mu$ l | 0.854 $\mu$ l<br>(49.16 $\mu$ M) | 1.56 $\mu$ l<br>(3 M) | 3 $\mu$ l | 0.586 $\mu$ l |

**Table S4.** Determination of dissociation constant  $K_d$  (mM) and  $\Delta G_{\text{binding}}$  (kcal/mol) of *trans*-acting TW17 ribozyme systems from Langmuir isotherm analyses.

| Binary Systems            | Dissociation Constant ( $K_d$ , $\mu$ M) | $\Delta G_{\text{binding}}$ (kcal/mol) | Notes                                                                                                                 |
|---------------------------|------------------------------------------|----------------------------------------|-----------------------------------------------------------------------------------------------------------------------|
| TW17S-1 RNA + TW17C-1 RNA | 0.18                                     | -9.19                                  | TW17S-1 RNA:18-mer RNA ; TW17C-1 RNA:66-mer RNA                                                                       |
| TW17S-2 RNA + TW17C-2 RNA | 0.81                                     | -8.30                                  | TW17S-2 RNA:21-mer RNA ; TW17C-2 RNA:71-mer RNA                                                                       |
| TW17S-3 RNA + TW17C-3 RNA | 1.61                                     | -7.89                                  | TW17S-3 RNA:24-mer RNA ; TW17C-3 RNA:73-mer RNA                                                                       |
| TW17S-4 RNA + TW17C-4 RNA | 0.51                                     | -8.57                                  | TW17S-4 RNA: 19-mer RNA, the 3' terminus ended with two C; TW17C-4 RNA :68-mer RNA, the 5' terminus ended with two G. |
| TW17S-5 RNA + TW17C-5 RNA | 0.19                                     | -9.16                                  | TW17S-5 RNA:17-mer RNA, the 3' terminus ended with two C; TW17C-5 RNA:66-mer RNA, the 5' terminus ended with two G.   |
| TW17S-6 RNA + TW17C-5     | 1.13                                     | -8.10                                  | TW17S-6 RNA: 17-mer RNA, the 3' terminus ended with U and C.                                                          |

|                                 |      |       |  |
|---------------------------------|------|-------|--|
| RNA                             |      |       |  |
| TW17S-1 RNA<br>+ TW17C-5<br>RNA | 0.15 | -9.30 |  |
| TW17S-2 RNA<br>+<br>TW17C-3 RNA | 0.25 | -9.00 |  |



S-19

Pulse Sequence: s2pu1  
UNITYplus-400 "unityplus400"  
Date\_Exp: 02/08/06  
Solvent: DMSO  
Ambient temperature  
Total 64 repetitions

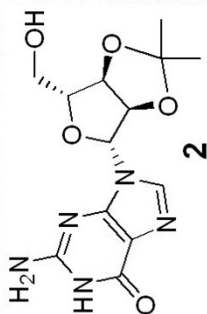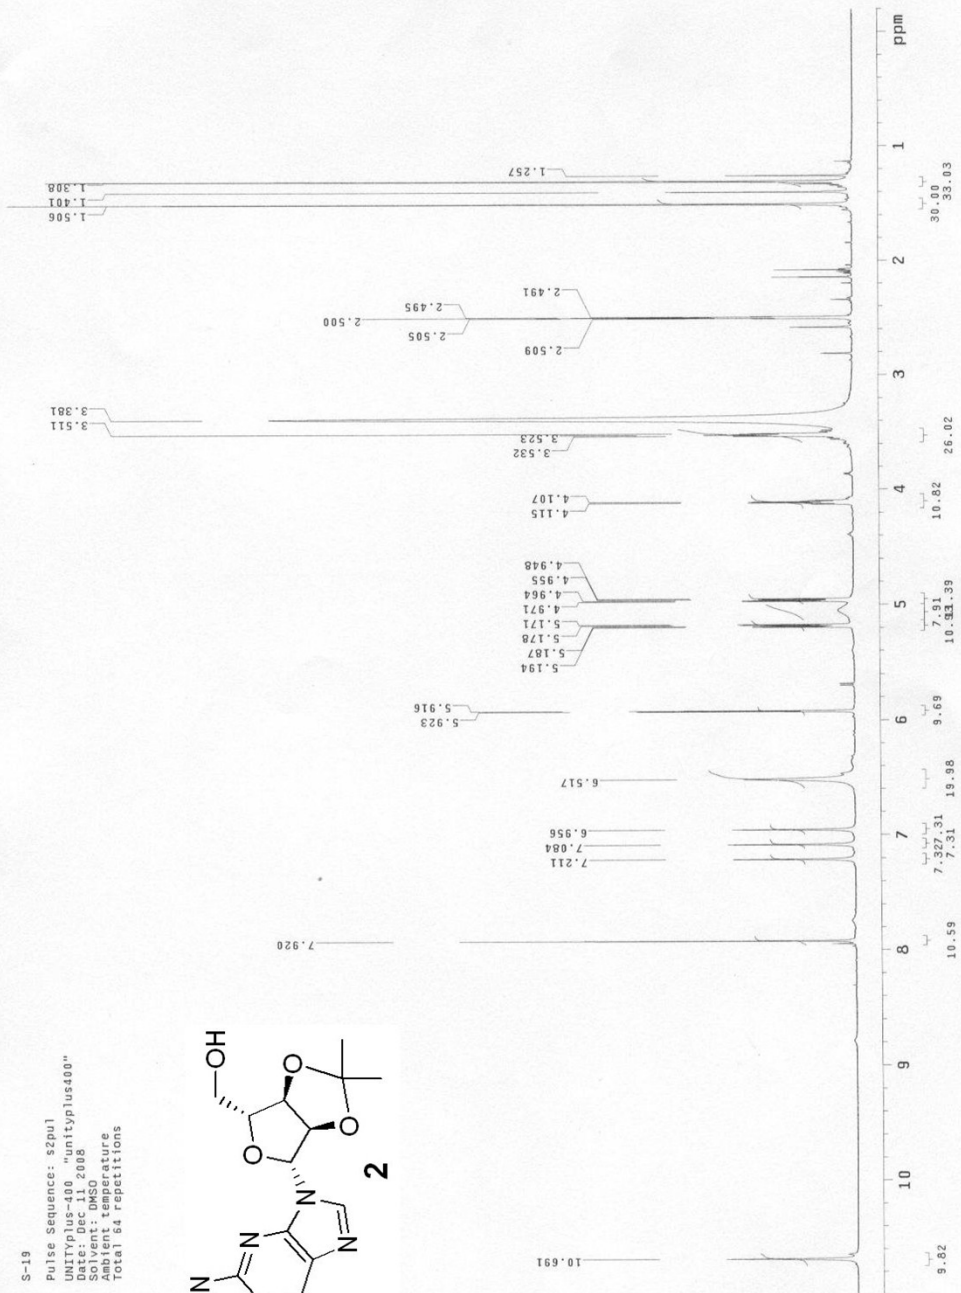

S-19  
 Pulse Sequence: s2pu1  
 UNITYplus-400 "unityplus400"  
 Date: Dec 11 2008  
 Solvent: DMSO  
 Ambient temperature  
 Total 1584 repetitions

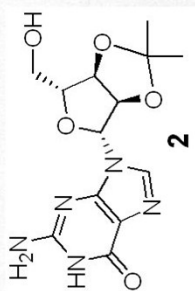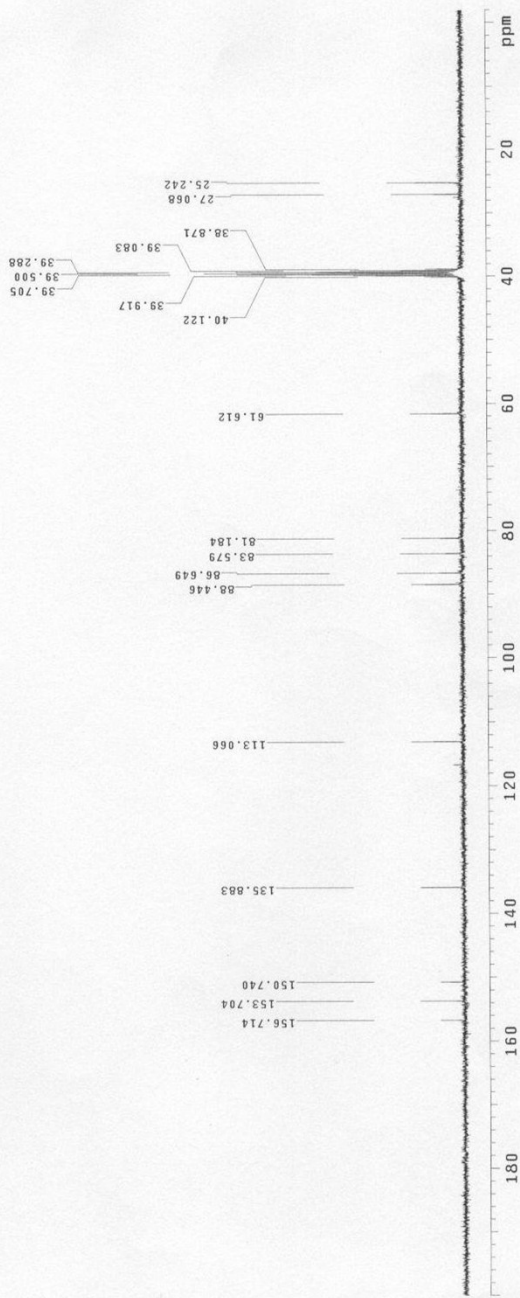

S-19  
Pulse Sequence: dept

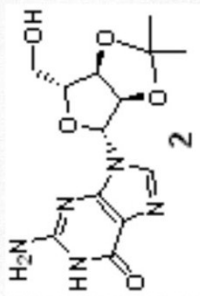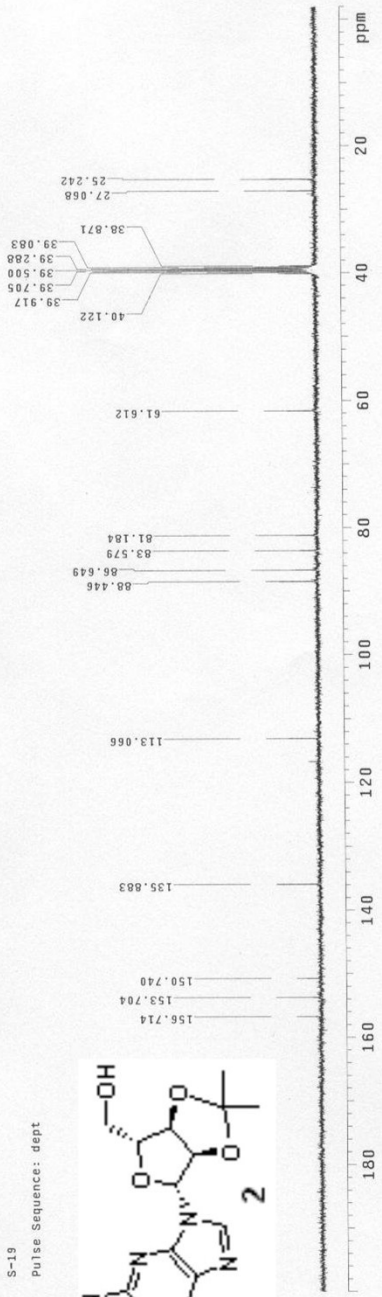



[ Theoretical Ion Distribution ]

Molecular Formula : C13 H17 O7 N5 P S Ba

(m/z 555.9639, MW 555.6770, U.S. 10.5)

Base Peak : 555.9639, Averaged MW : 555.6729(a), 555.6757(w)

| m/z      | INT.           |
|----------|----------------|
| 547.9649 | 0.1426         |
| 548.9675 | 0.0251         |
| 549.9637 | 0.1463         |
| 550.9662 | 0.0254         |
| 551.9631 | 3.2621 **      |
| 552.9644 | 9.4432 *****   |
| 553.9636 | 12.3662 *****  |
| 554.9646 | 17.6518 *****  |
| 555.9639 | 100.0000 ***** |
| 556.9663 | 18.2164 *****  |
| 557.9632 | 7.2208 ****    |
| 558.9650 | 1.0587 *       |
| 559.9654 | 0.1709         |
| 560.9671 | 0.0191         |
| 561.9684 | 0.0020         |

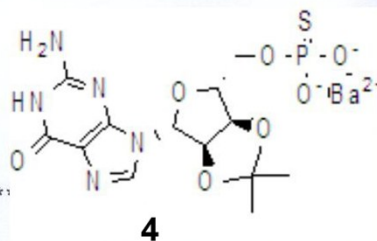

[ Elemental Composition ]

Data : EIHR333

Date : 09-Mar-2009 15:55

Sample: S-20

Note : NBA+glycerol

Inlet : Direct

Ion Mode : FAB+

RT : 0.67 min

Scan#: 5

Elements : C 13/0, H 17/0, O 7/0, N 5/0, P 1/0, S 1/0, Ba 1/0

Mass Tolerance : 5mmu

Unsaturation (U.S.) : 0.5 - 30.0

| Observed m/z | Int% | Err [ppm / mmu] | U.S. Composition              |
|--------------|------|-----------------|-------------------------------|
| 555.9640     | 20.0 | +0.2 / +0.1     | 10.5 C 13 H 17 O 7 N 5 P S Ba |

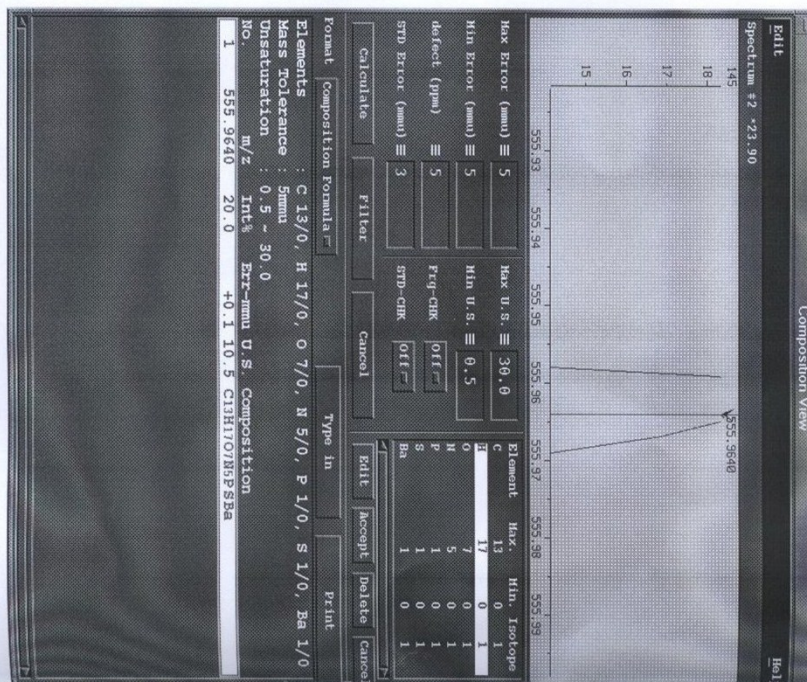

S-21  
 Pulse Sequence: s2pu1  
 UNITYplus-400 "unityplus400"  
 Date: Dec 11 2008  
 Solvent: D2O  
 Temperature:  
 Total 128 Repetitions

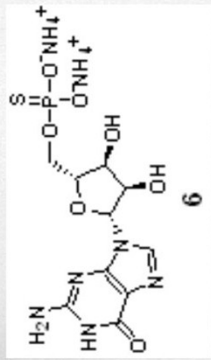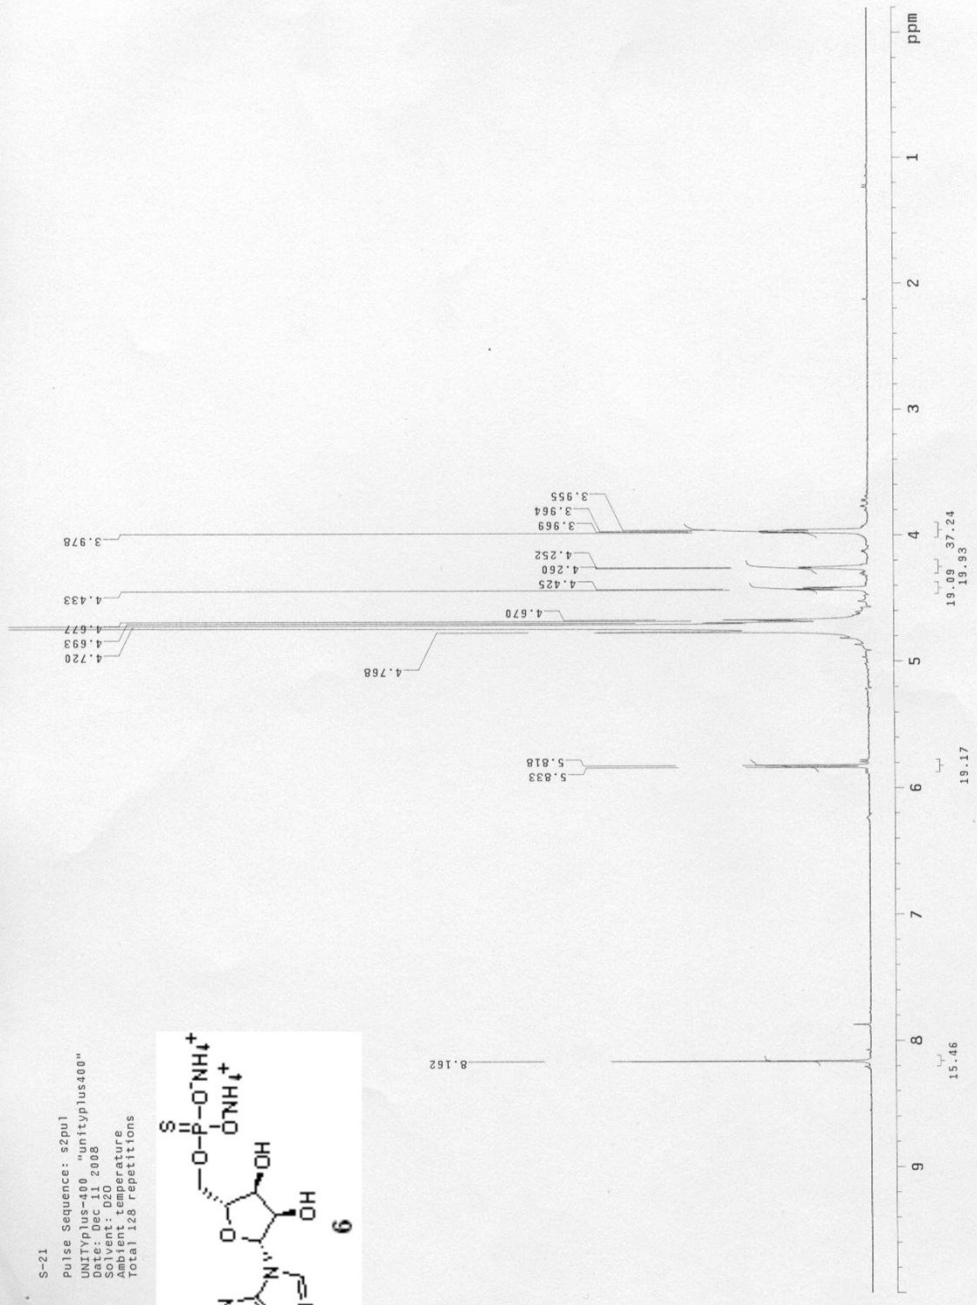

S-21  
 Pulse Sequence: szpu1  
 UNITYplus-400 "unityplus400"  
 Date: Dec 11 2008  
 Solvent: D2O  
 Temperature:  
 Total 4576 repetitions

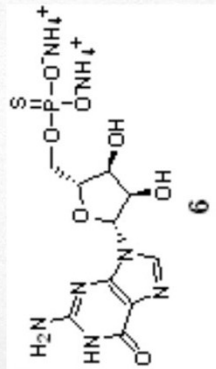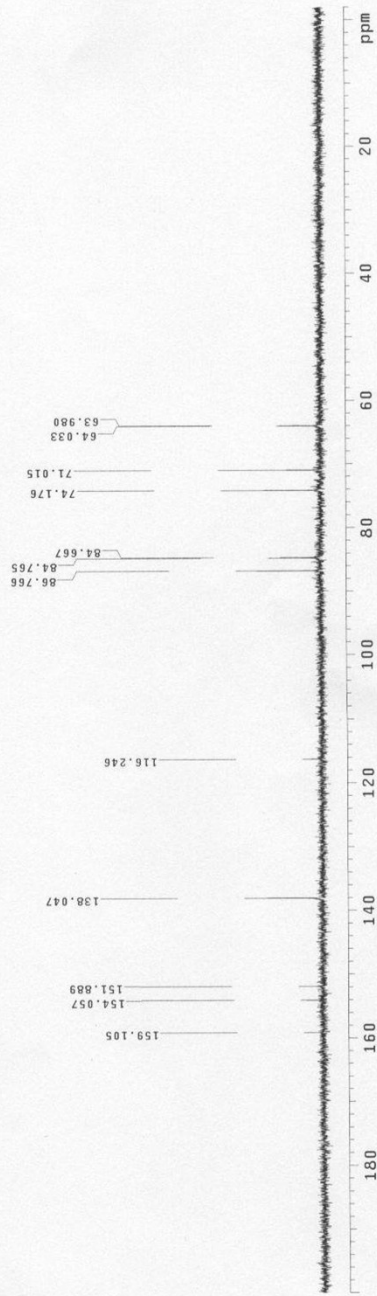

S-21  
Pulse Sequence: dept

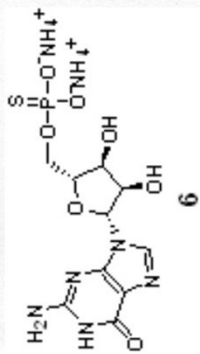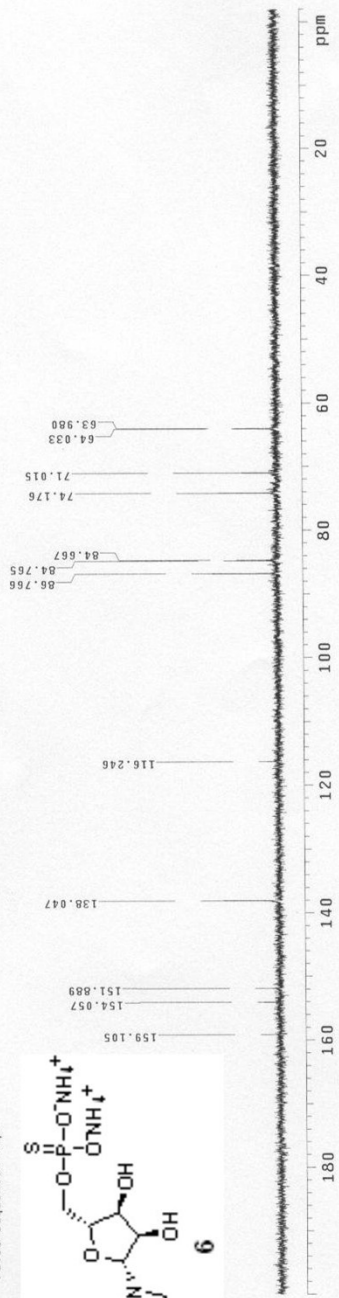



GMPS

Pulse Sequence: s2pul  
INOVA-400 "unityplus000"  
F011  
Solvent: D2O  
Ambient temperature  
Total 328 repetitions

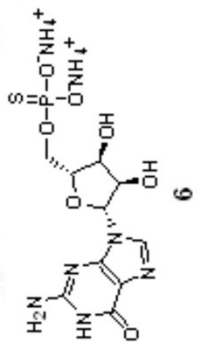

43.697

90 80 70 60 50 40 30 20 10 ppm



S-5b

Pulse Sequence: s2pu1  
UNITYplus-400 "unityplus400"  
Date: Jan 15 2009  
Time: 12:00:00  
Ambient temperature  
Total 32 repetitions

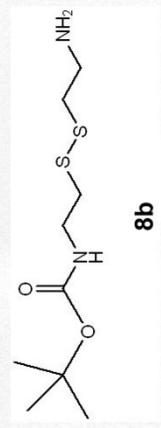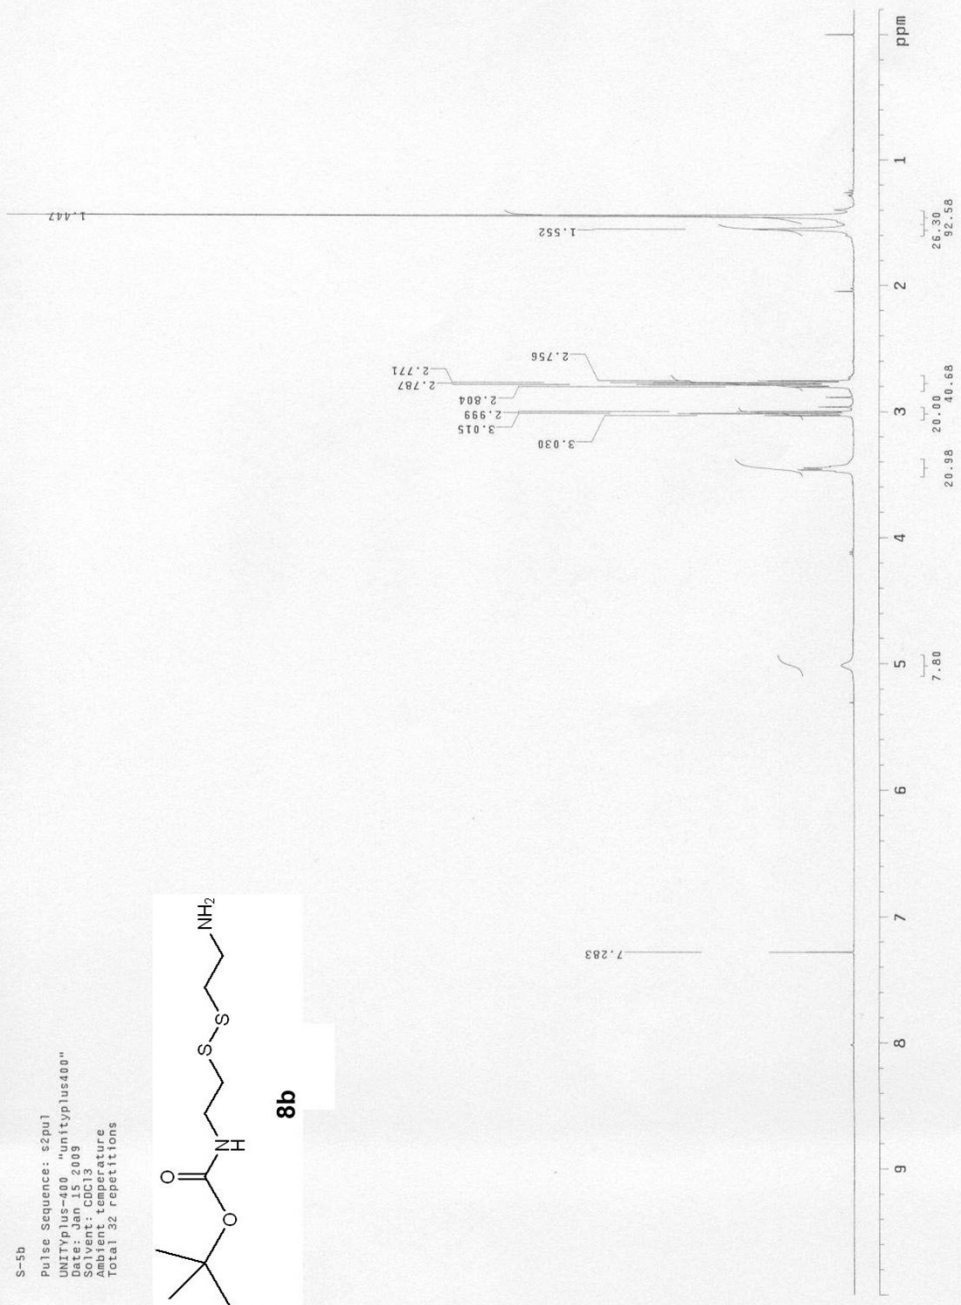

S-5b

Pulse Sequence: s2pul  
UNITYplus-400 "unityplus400"  
Date: Jan 05 2009  
Time: 12:30:09  
Ambient temperature  
Total 1024 repetitions

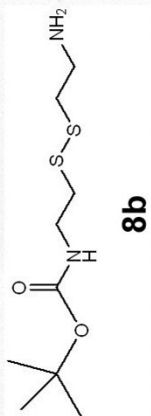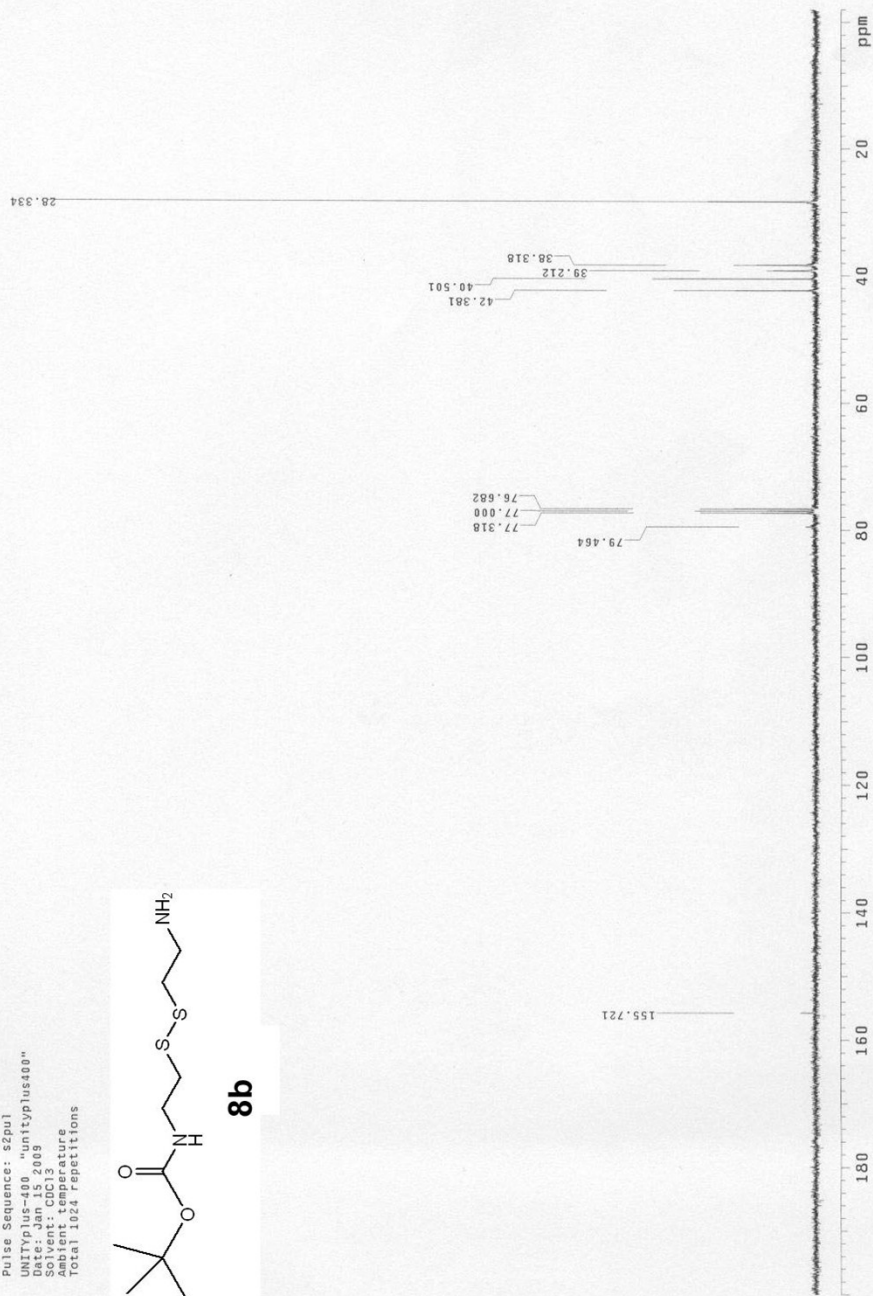

S-5b ESI+  
Molecular Formula : C<sub>9</sub>H<sub>21</sub>N<sub>2</sub>O<sub>2</sub>S<sub>2</sub>  
Exact Mass : 253.1044  
Measured Mass: 253.1042

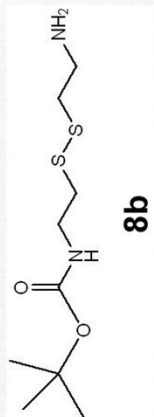

253.1042

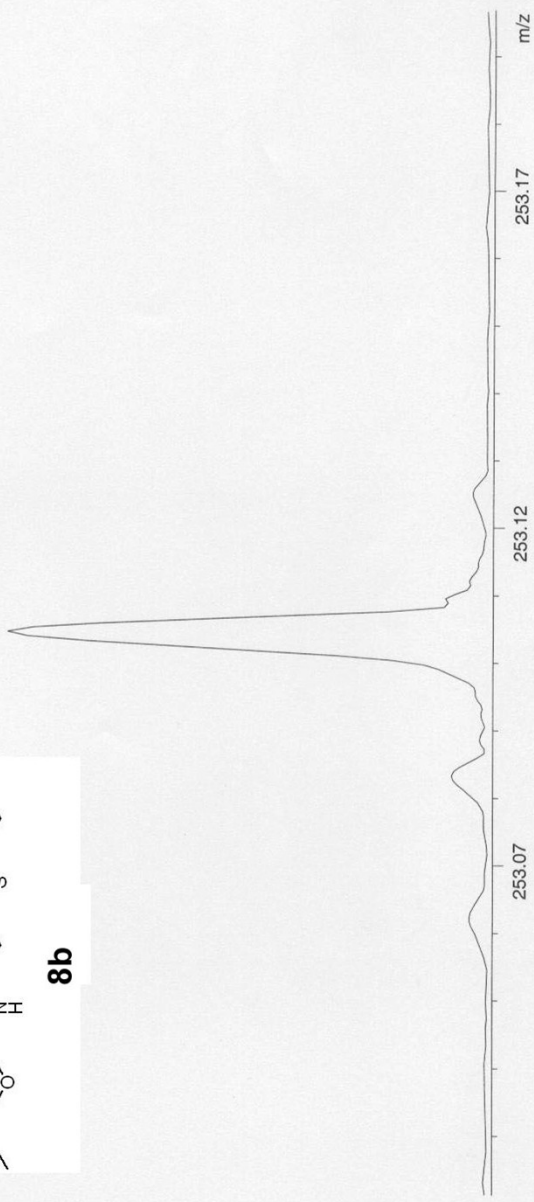

/d=/Data/yu/S5B/1/pdata/1 Administrator Tue Dec 2 11:43:50 2008

Boc-hex-ACBr  
Mercury-40088 "Mercuryplus400"  
Date: Aug 3 2011  
Solvent: DMSO  
Temperature:  
Total 32 repetitions

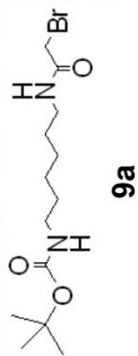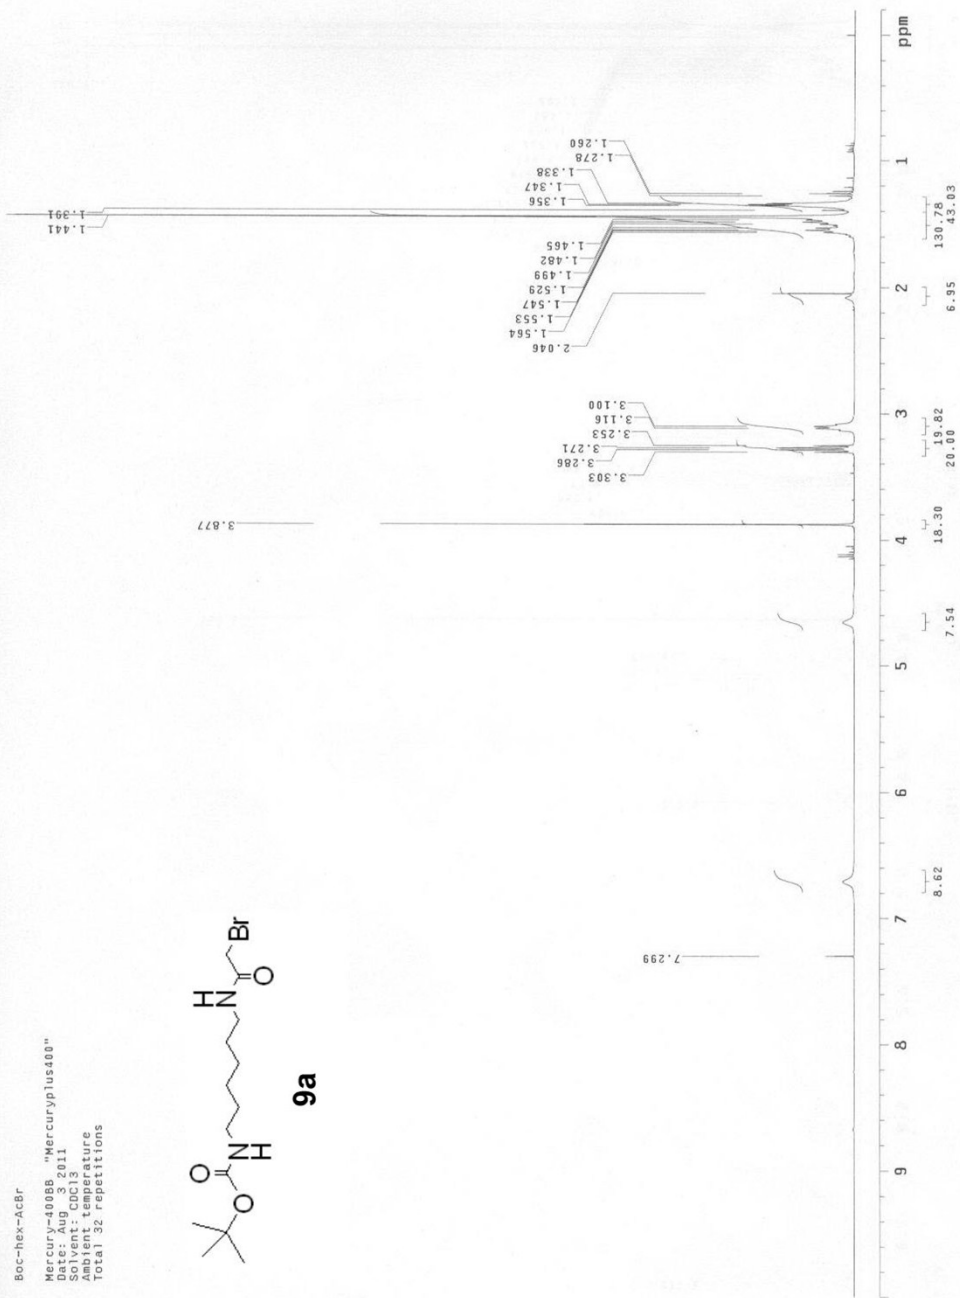

Boc-hex-ACBr  
Mercury-40088 "Mercuryplus400"  
Date: Aug 3 2011  
Solvent: DMSO  
Temperature  
Total 864 repetitions

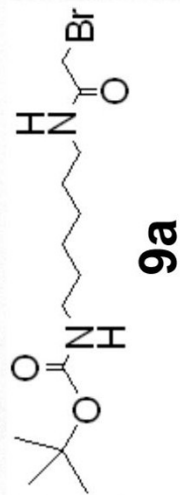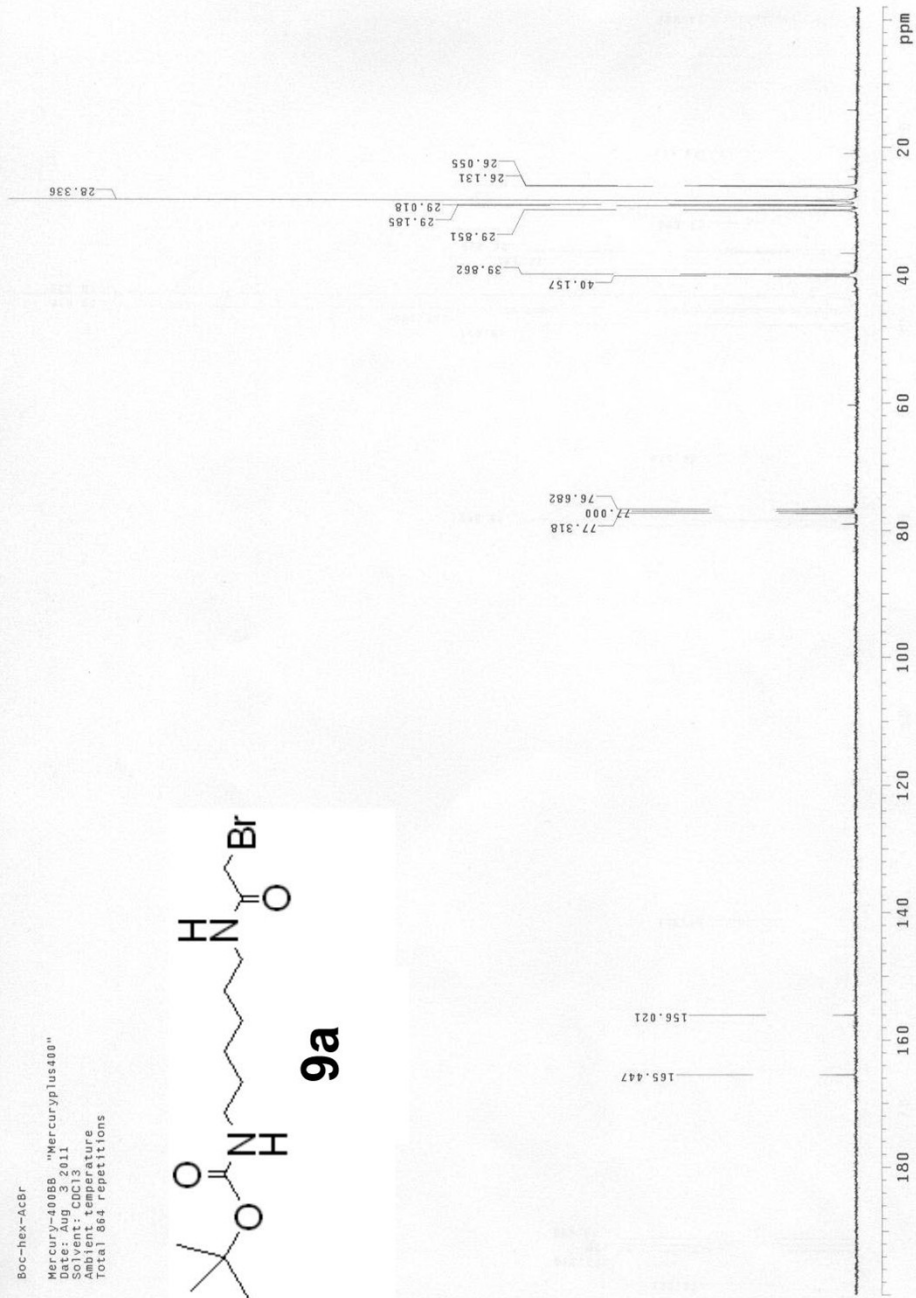

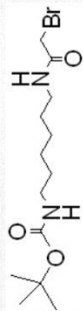

**9a**

Boc-Hex-AcBr ESI+  
Molecular Formula: C<sub>13</sub>H<sub>25</sub>BrN<sub>2</sub>O<sub>3</sub>Na  
Exact Mass: 359.0946  
Measured Mass: 359.0949

359.0949

361.0929

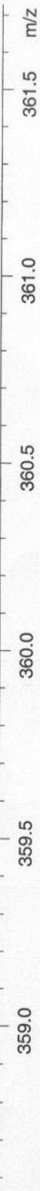

/d=/Data/yu/bochexacbr/1/pdata/1 Administrator Wed Sep 7 16:09:07 2011



Boc-cystamine-Br\*Ac

Pulse Sequence: szpul  
UNITYplus-400 "unityplus400"  
Date: Jun 30 2009  
Time: 12:00:00  
Solvent: acetonitrile  
Ambient temperature  
Total 80 repetitions

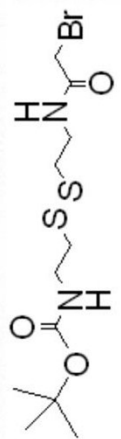

**9b**

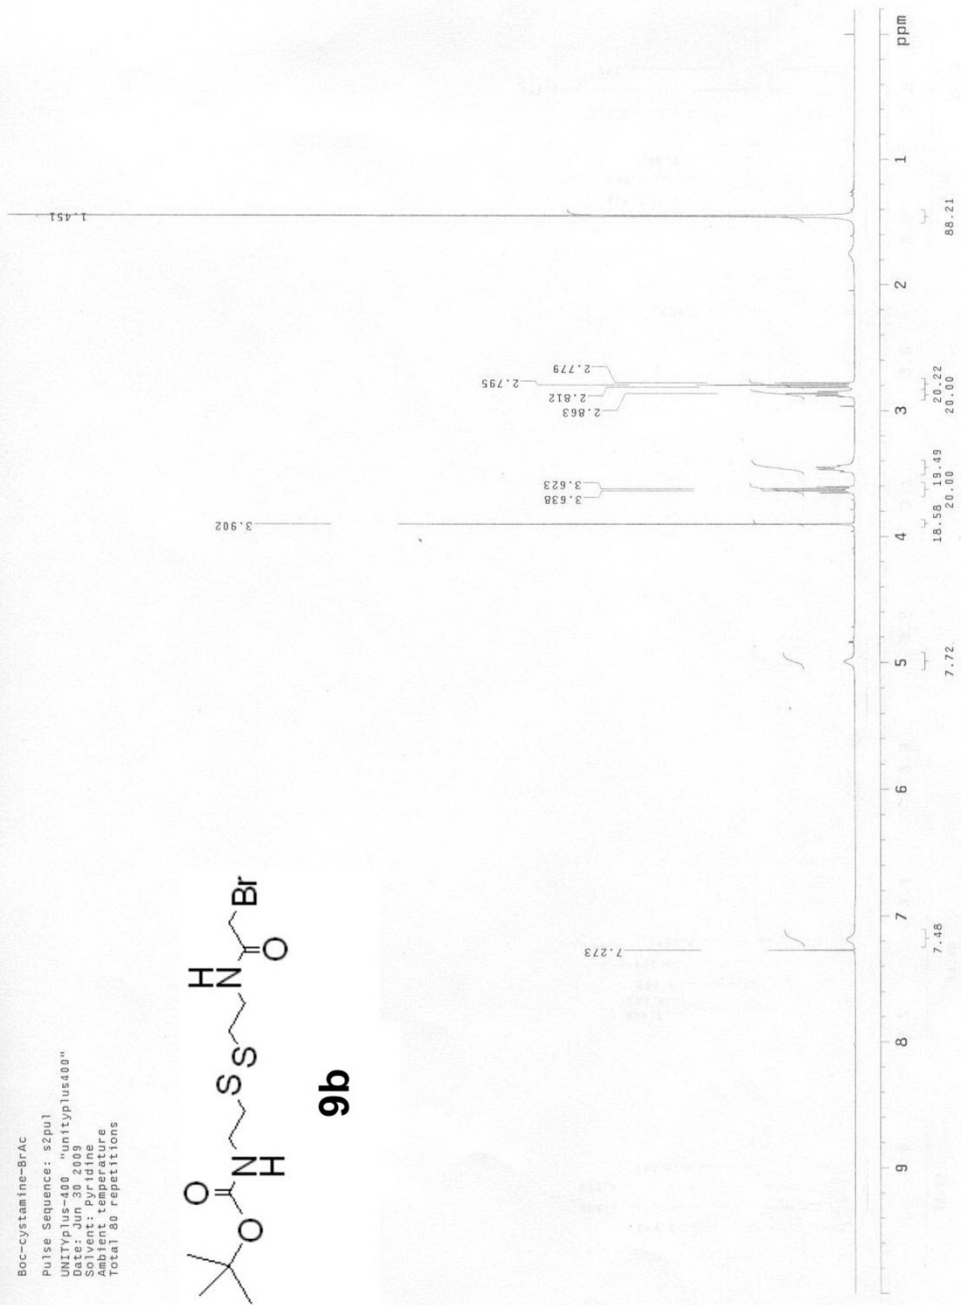

Boc-cystamine-BrAC

Pulse Sequence: s2pu1  
UNITYplus-400 "unityplus400"  
Date: Jun 30 2009  
Time: 10:00:00  
Solvent: CDCl3  
Temperature: 25.00  
Total 12800 repetitions

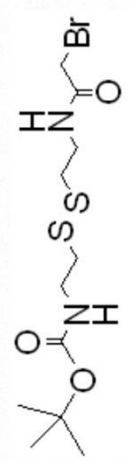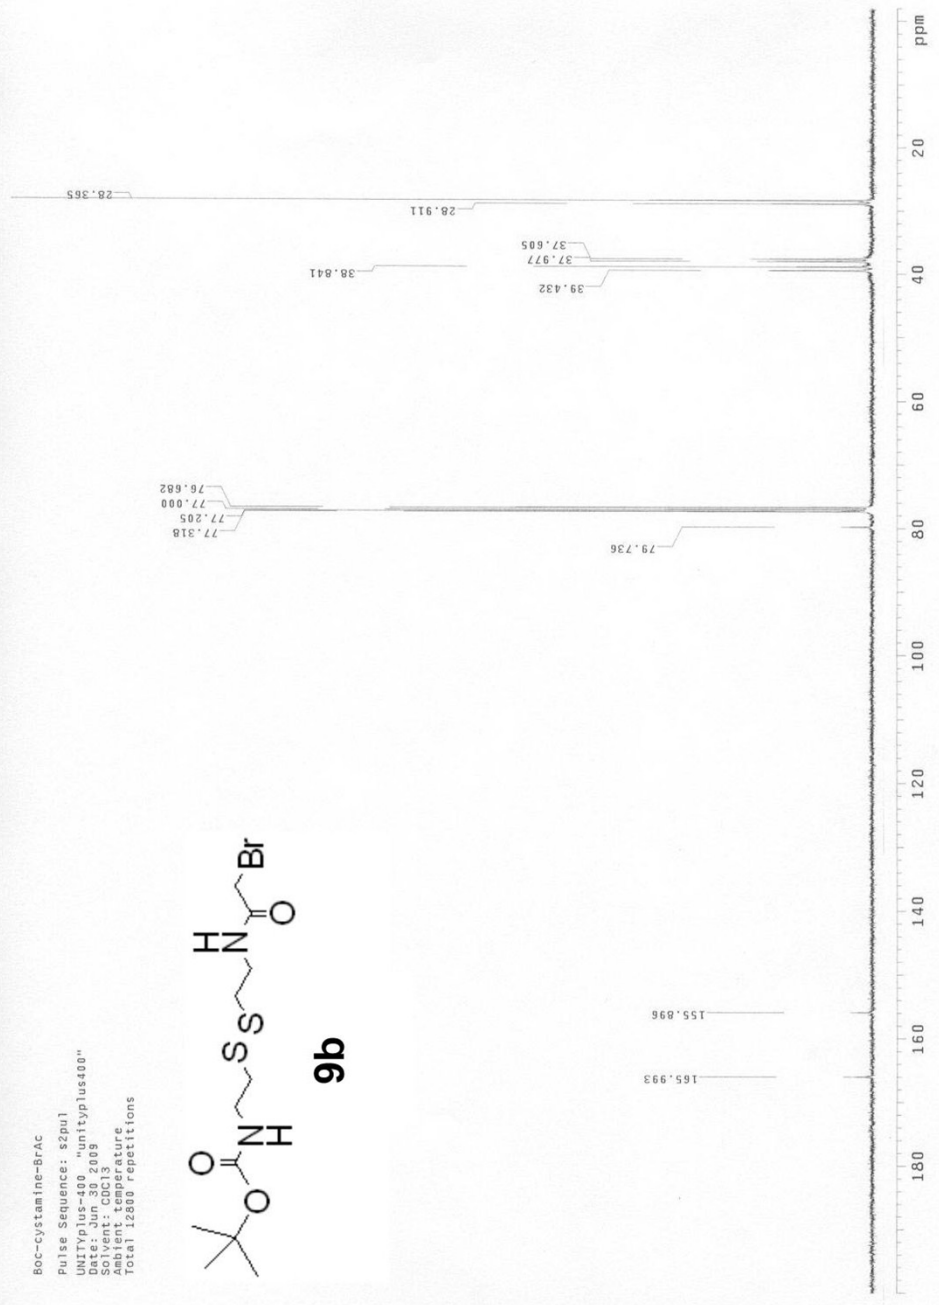

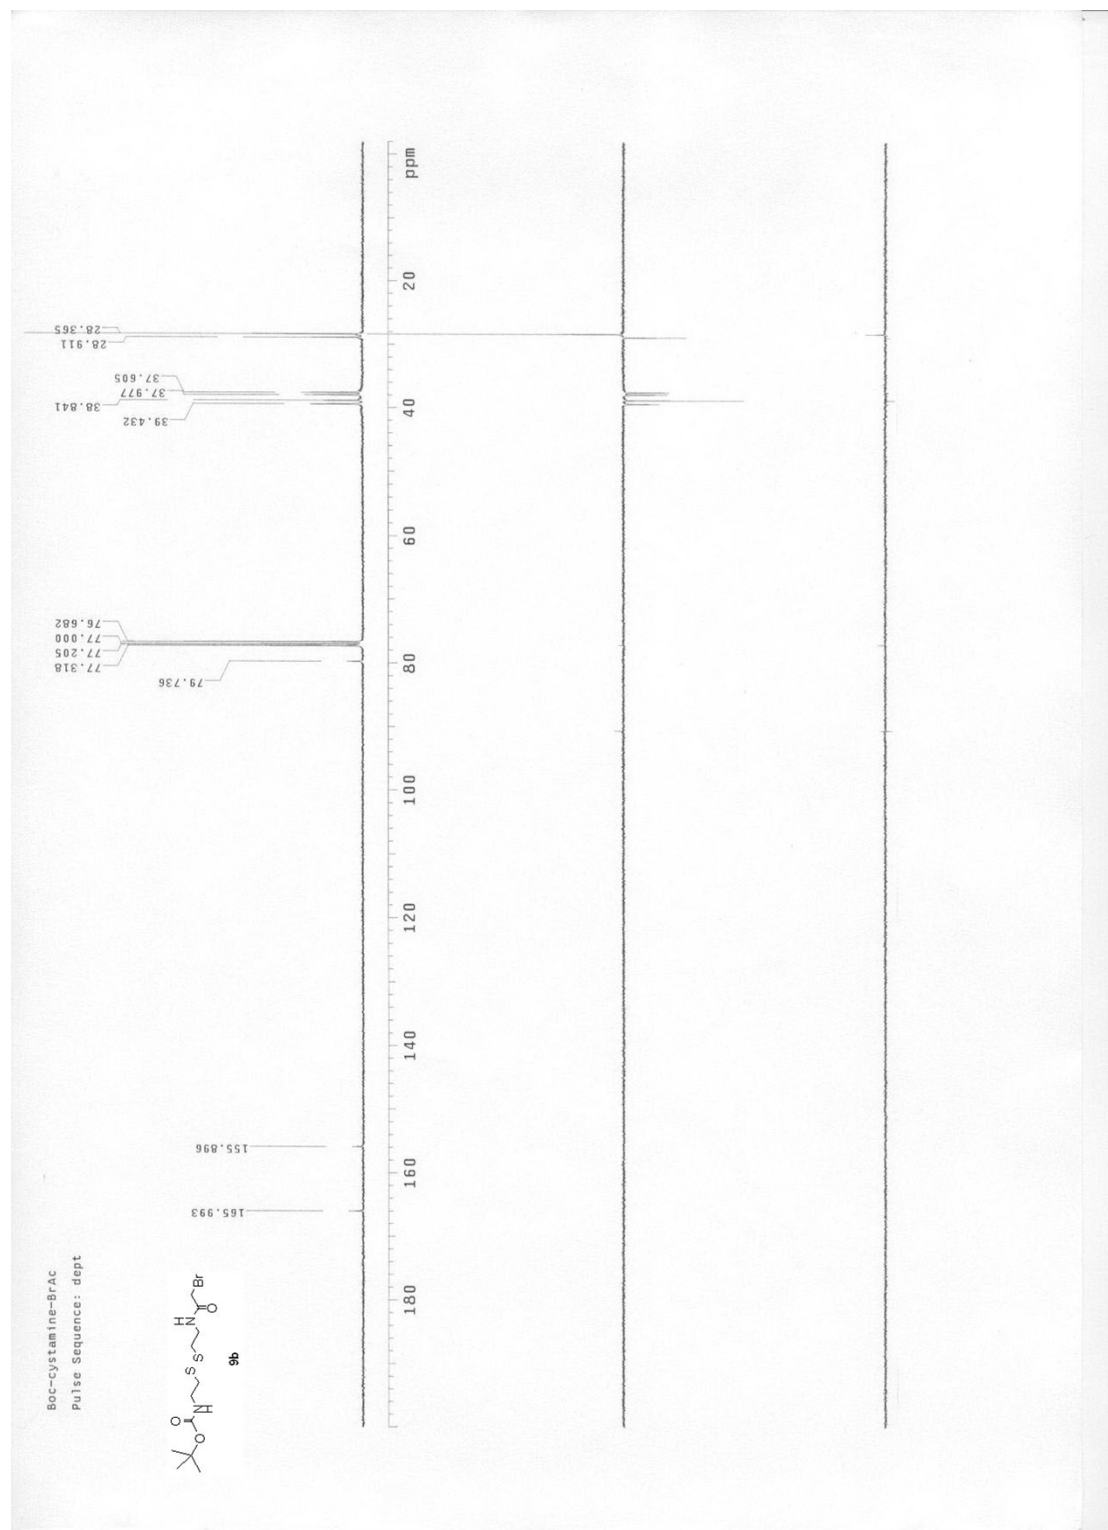

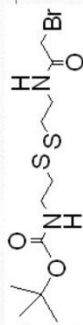

**9b**

Boc-cystamine-BrAc ESI+  
Molecular Formula : C<sub>11</sub>H<sub>21</sub>BrN<sub>2</sub>O<sub>3</sub>S<sub>2</sub>Na  
Exact Mass : 395.0075  
Measured Mass: 395.0073

397.0048

395.0073

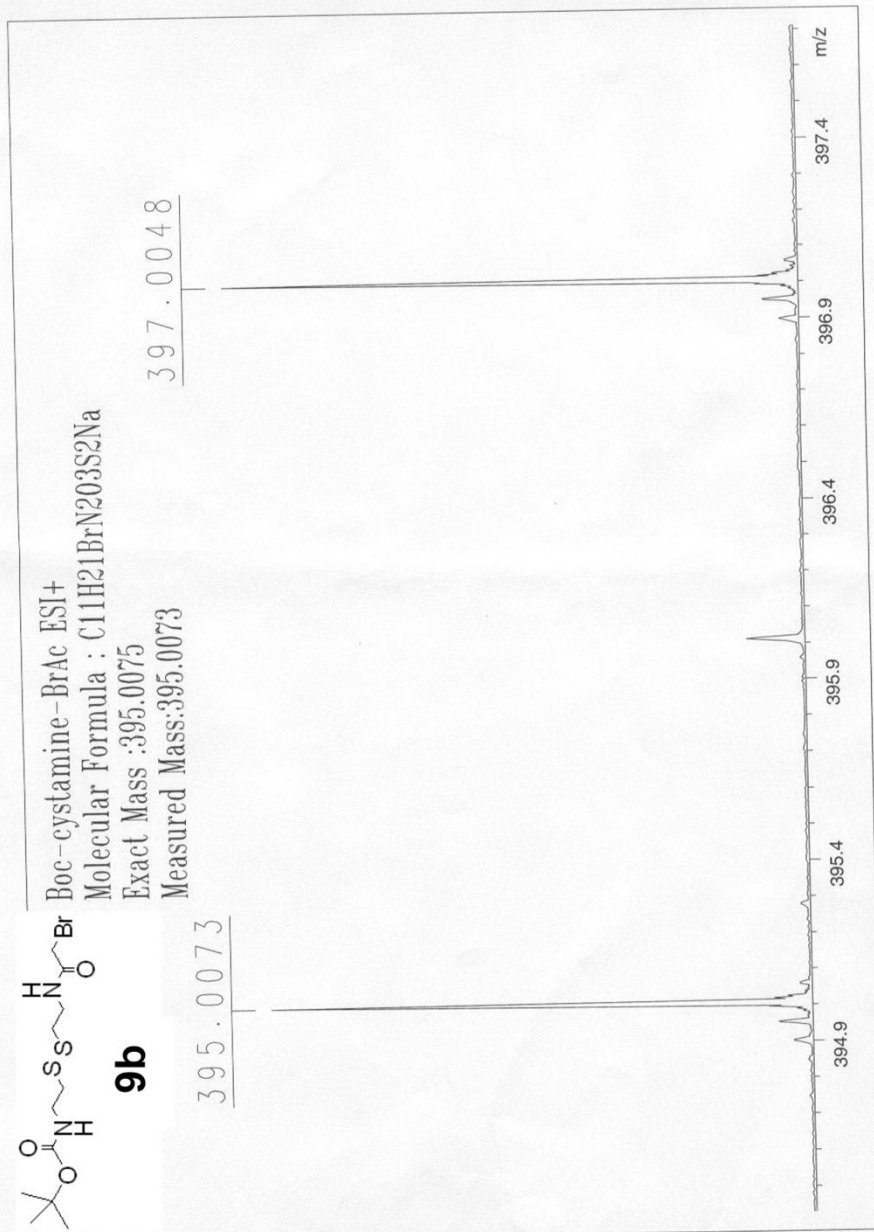

/d=/Data/yu/bococystaminebrac/4/pdata/1 Administrator Thu Jul 9 17:13:49 2009

Hex-ACBr-TFA  
Mercury-40088 "Mercuryplus400"  
Date: Oct 21 2011  
Solvent: CD3OD  
Ambient Temperature  
Total 32 repetitions

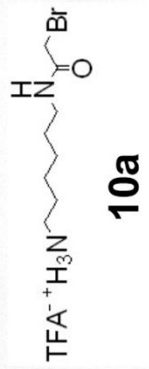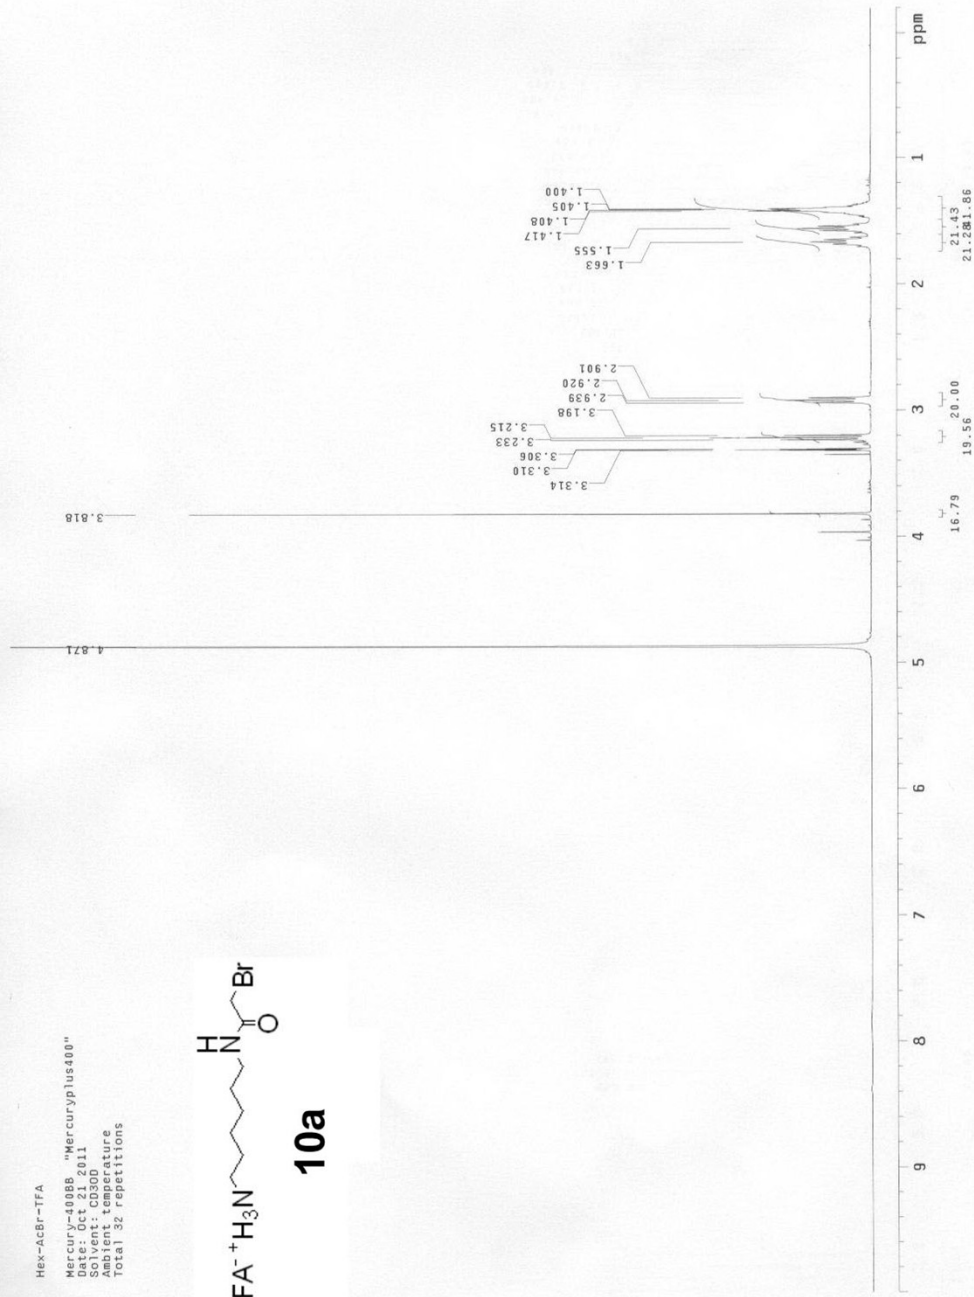

Hex-ACBr-TFA

Mercury-40068B "Mercuryplus400"  
Date: Oct 21 2011  
Solvent: CD300  
Ambient temperature  
Total 2309 repetitions

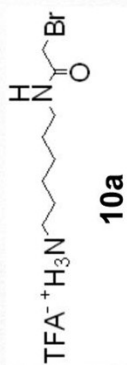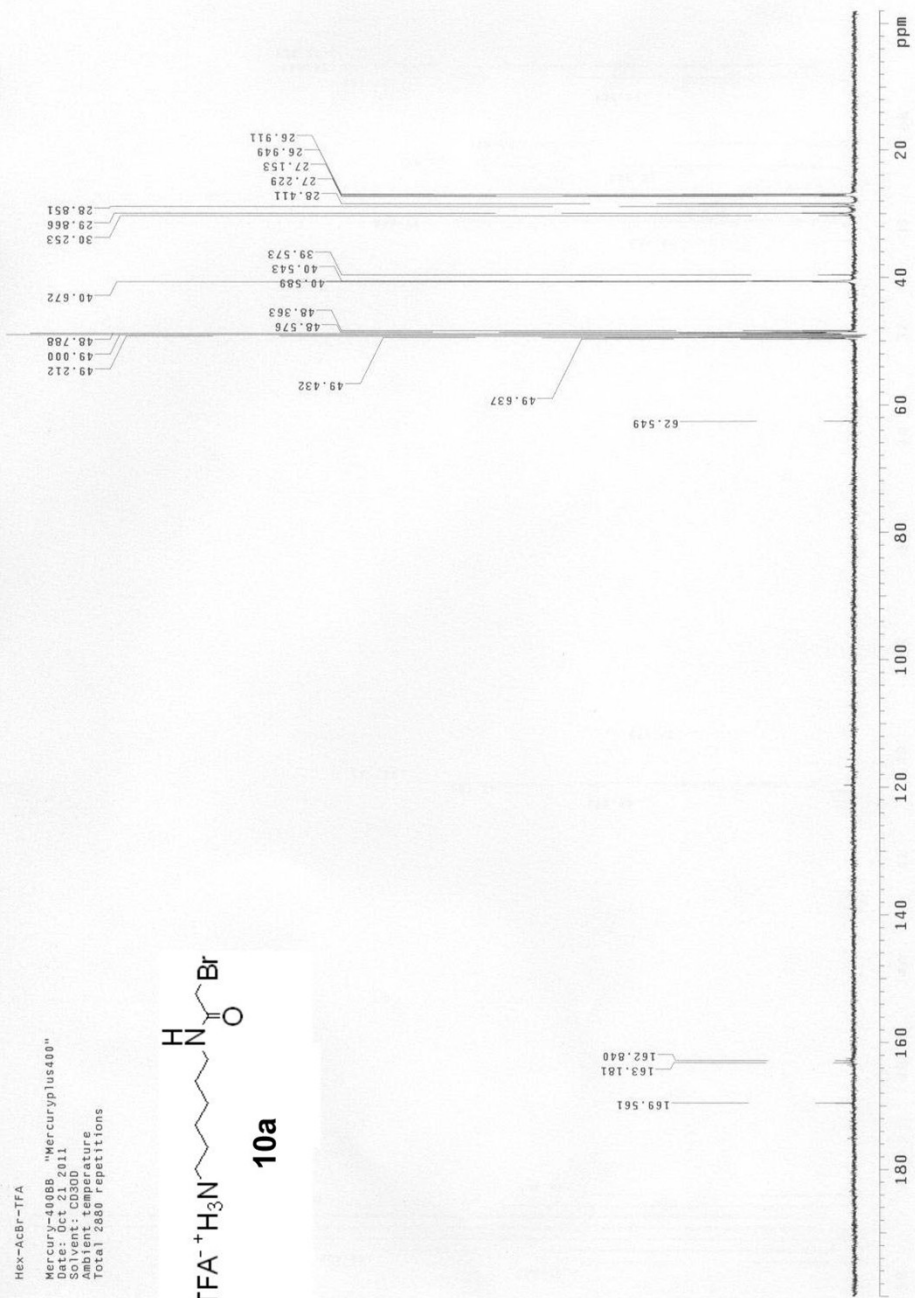

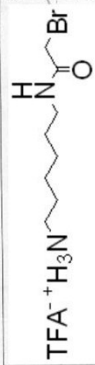

**10a**

~~Box~~ Hex-AcBr-TFA ESI+  
Molecular Formula: C<sub>8</sub>H<sub>18</sub>BrN<sub>2</sub>O  
Exact Mass: 237.0602  
Measured Mass: 237.0601

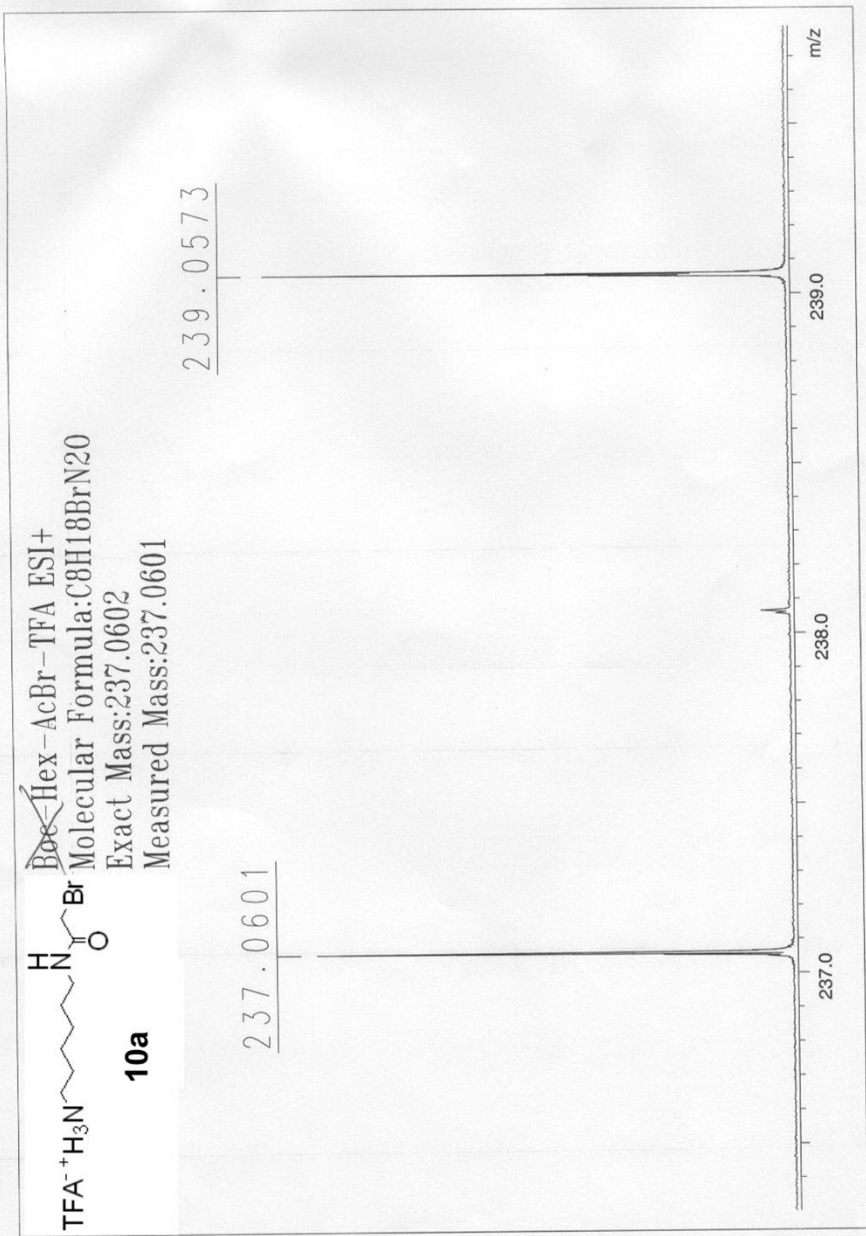

/d=/Data/yu/BCCHEXACBRTFA/2/pdata/1 Administrator Thu Sep 22 16:16:30 2011

Cystamine-BrAC-TFA salt

Mercury-400BB "Mercuryplus400"  
Date: Jun 30, 2009  
Time: 10:00:00  
Ambient temperature  
Total 64 repetitions

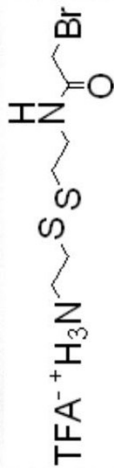

10b

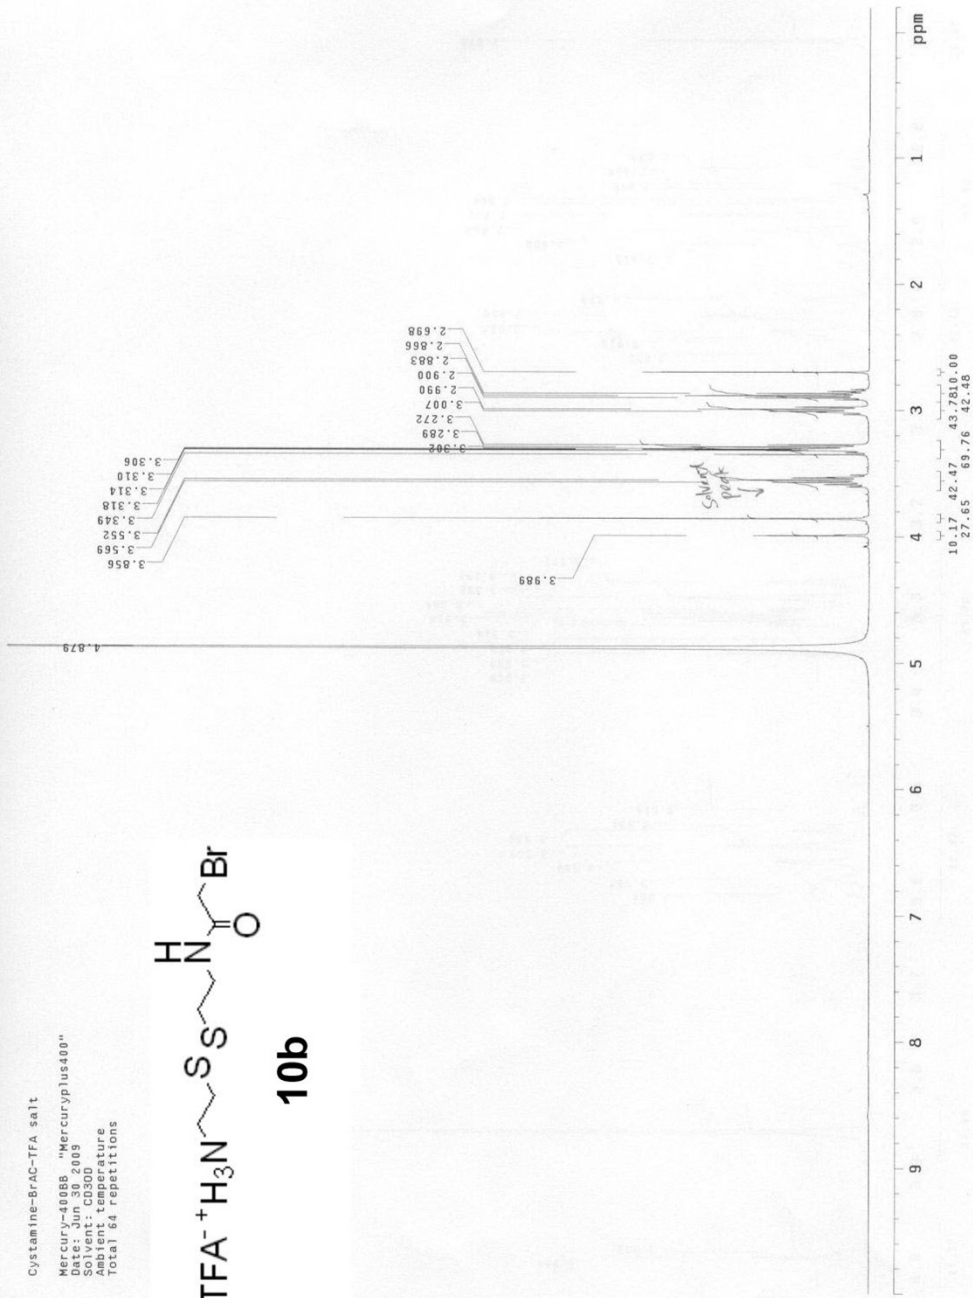



Cystamine-Br-AC-TFA salt  
Mercury-400888 "Mercuryplus400"  
Date: Jun 09 2009  
Time: 09:20  
Ambient Temperature  
Total 12800 repetitions

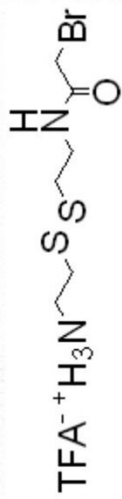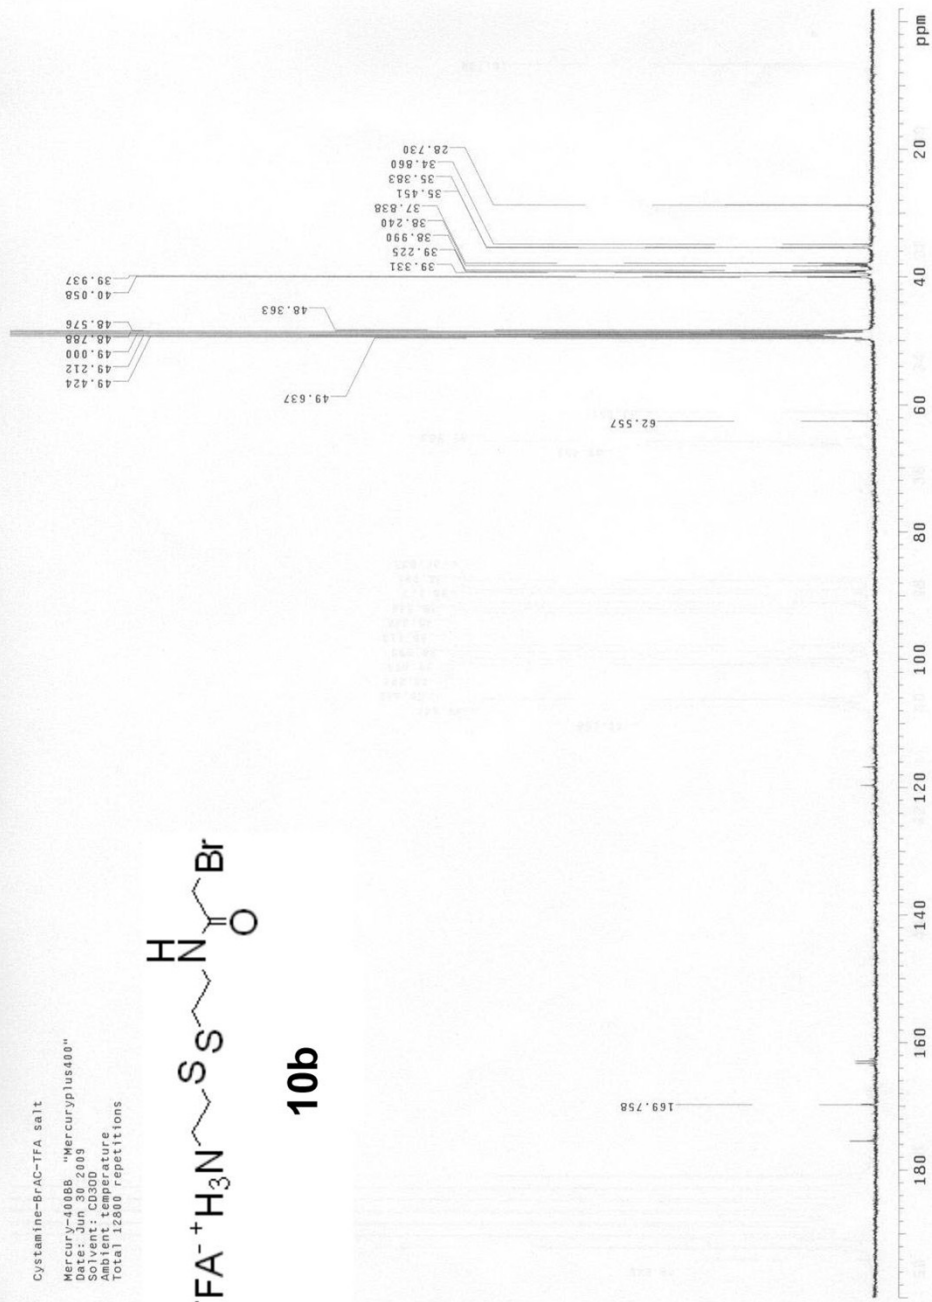

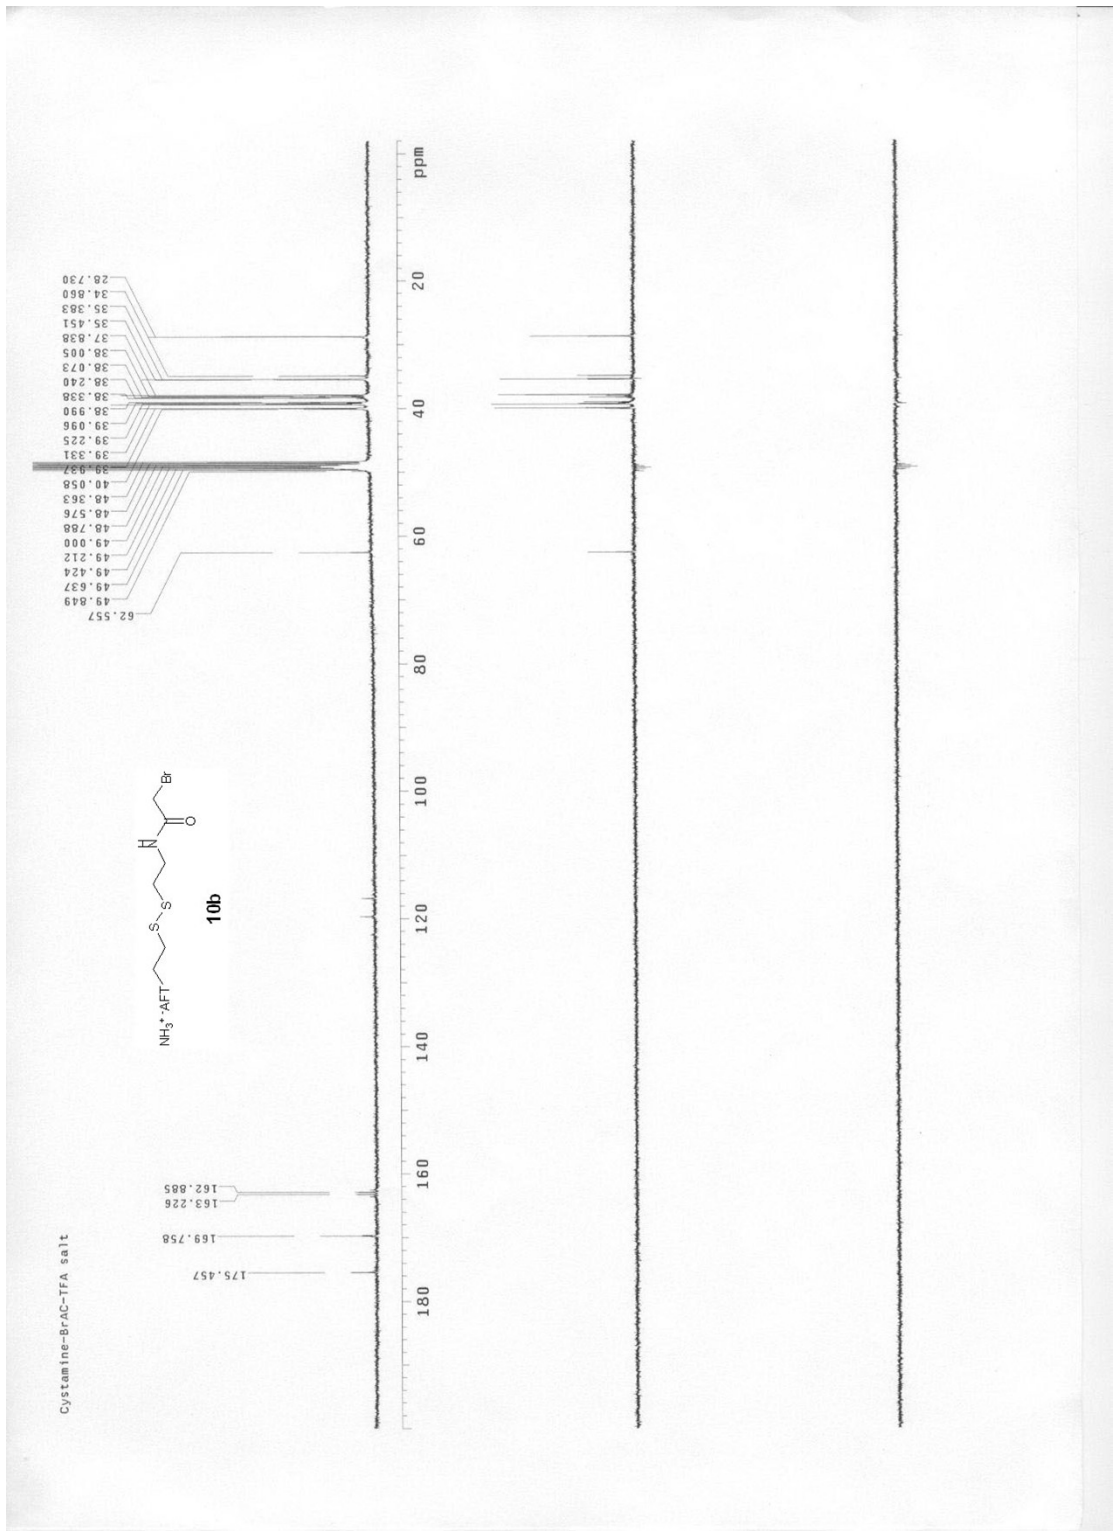

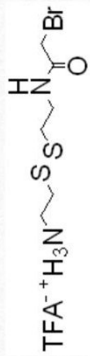

**10b**

Crystamine-BrAc ESI+  
Molecular Formula : C6H14BrN2OS2  
Exact Mass :272.9731  
Measured Mass:272.9733

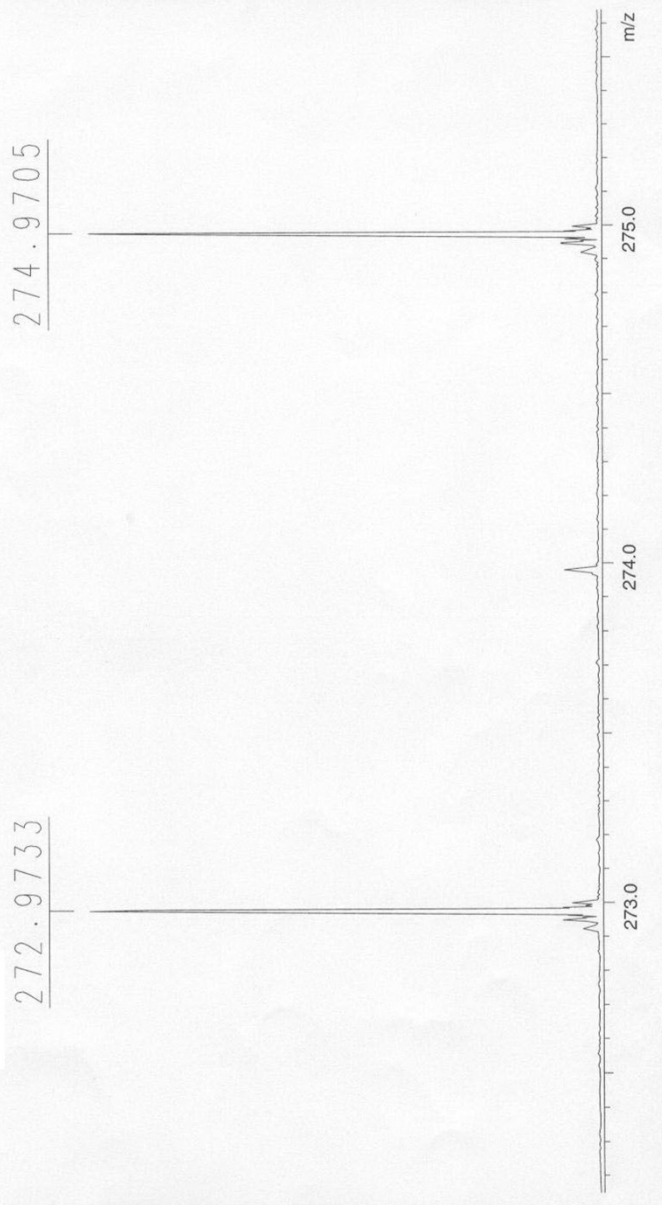

/d=/Data/yu/CYRSTAMINEBRAC/2/pdata/1 Administrator Mon Jun 15 16:14:16 2009

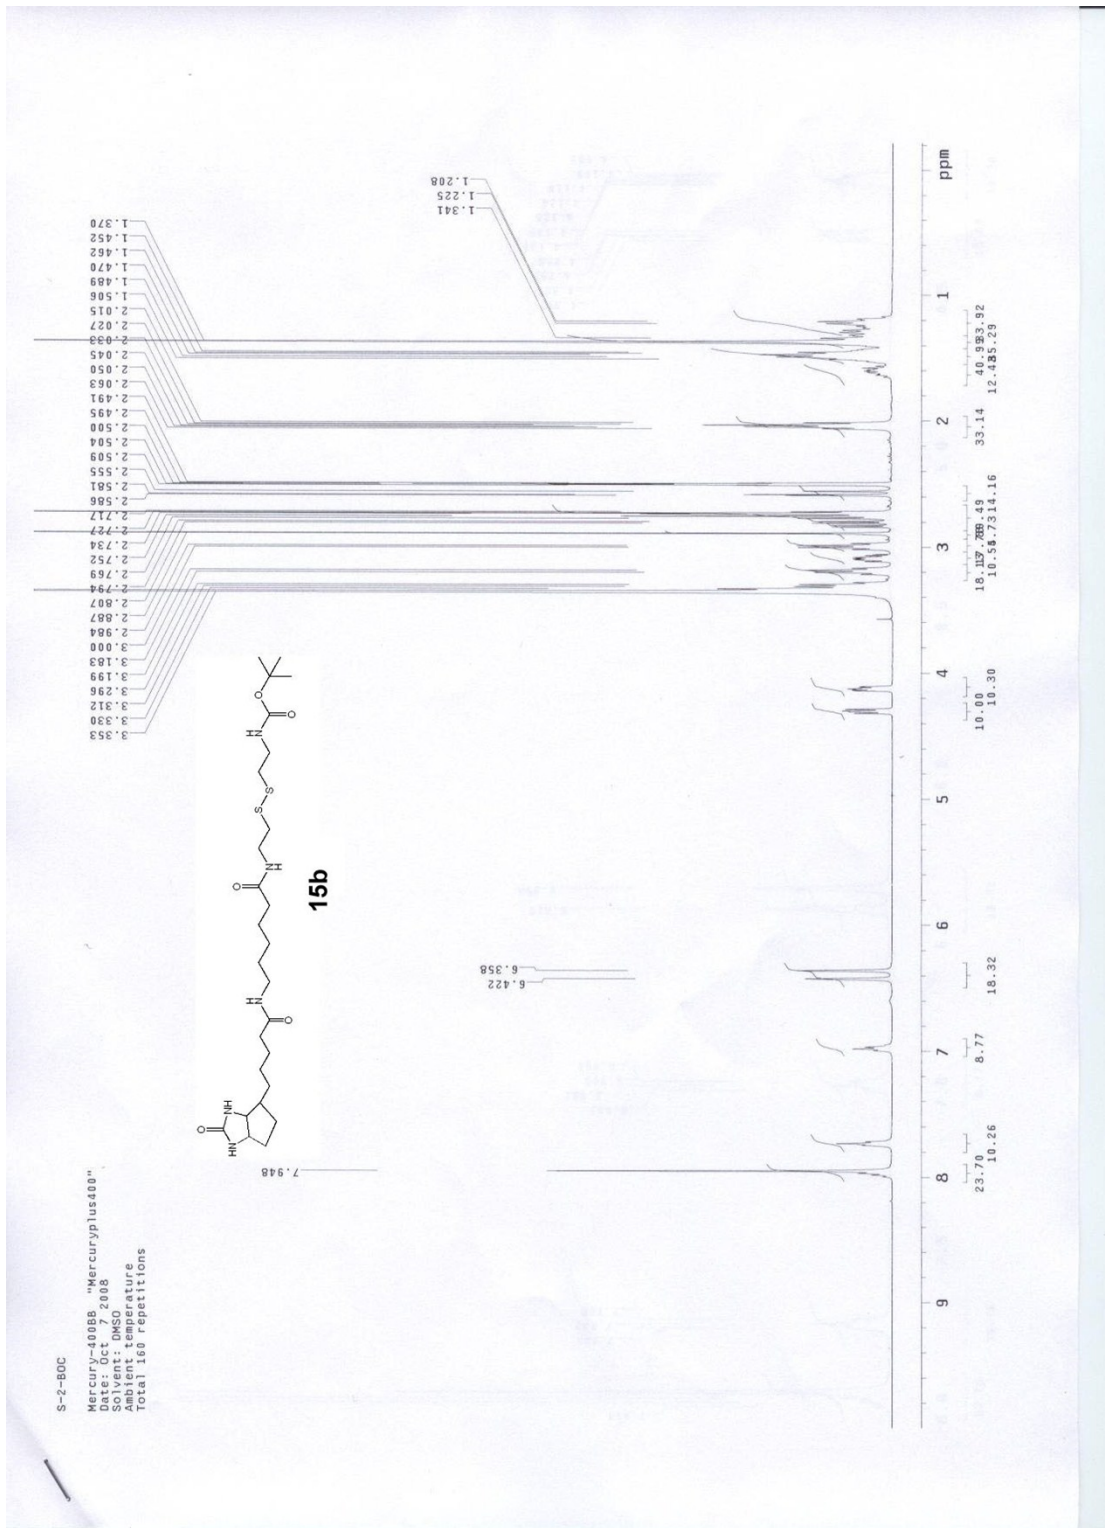

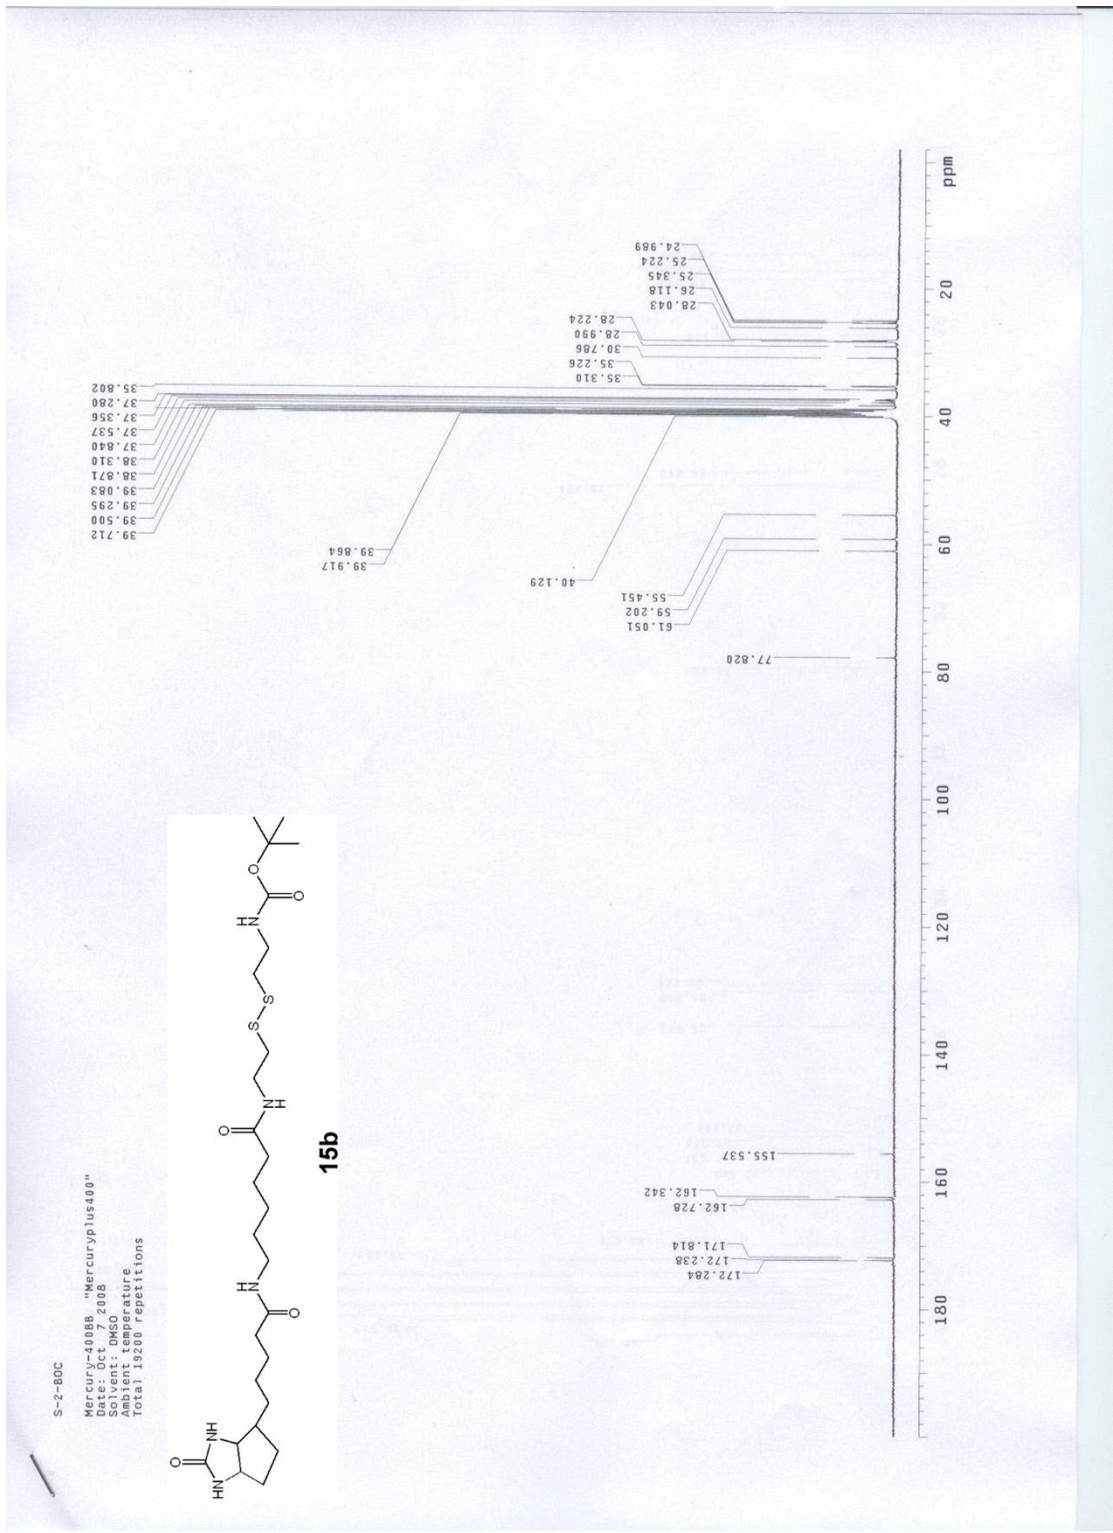

S-12 ESI+  
Molecular Formula : C<sub>25</sub>H<sub>45</sub>N<sub>5</sub>O<sub>5</sub>S<sub>3</sub>Na  
Exact Mass : 614.2480  
Measured Mass : 614.2477

614.2477

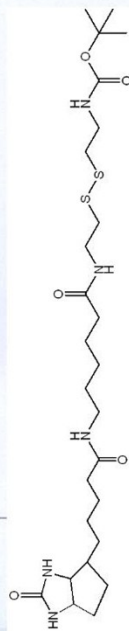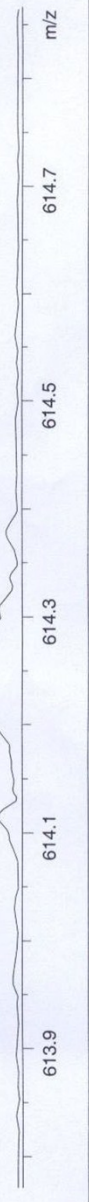

/d=/Data/yu/S12/3/pdata/1 Administrator Thu Sep 11 15:39:12 2008

S-7b  
 Pulse Sequence: s2pul  
 UNITYplus-400 "unityplus400"  
 Date: Dec 10 2008  
 Solvent: CD300  
 Ambient temperature  
 Total 160 Repetitions

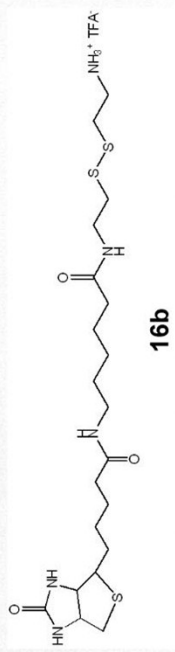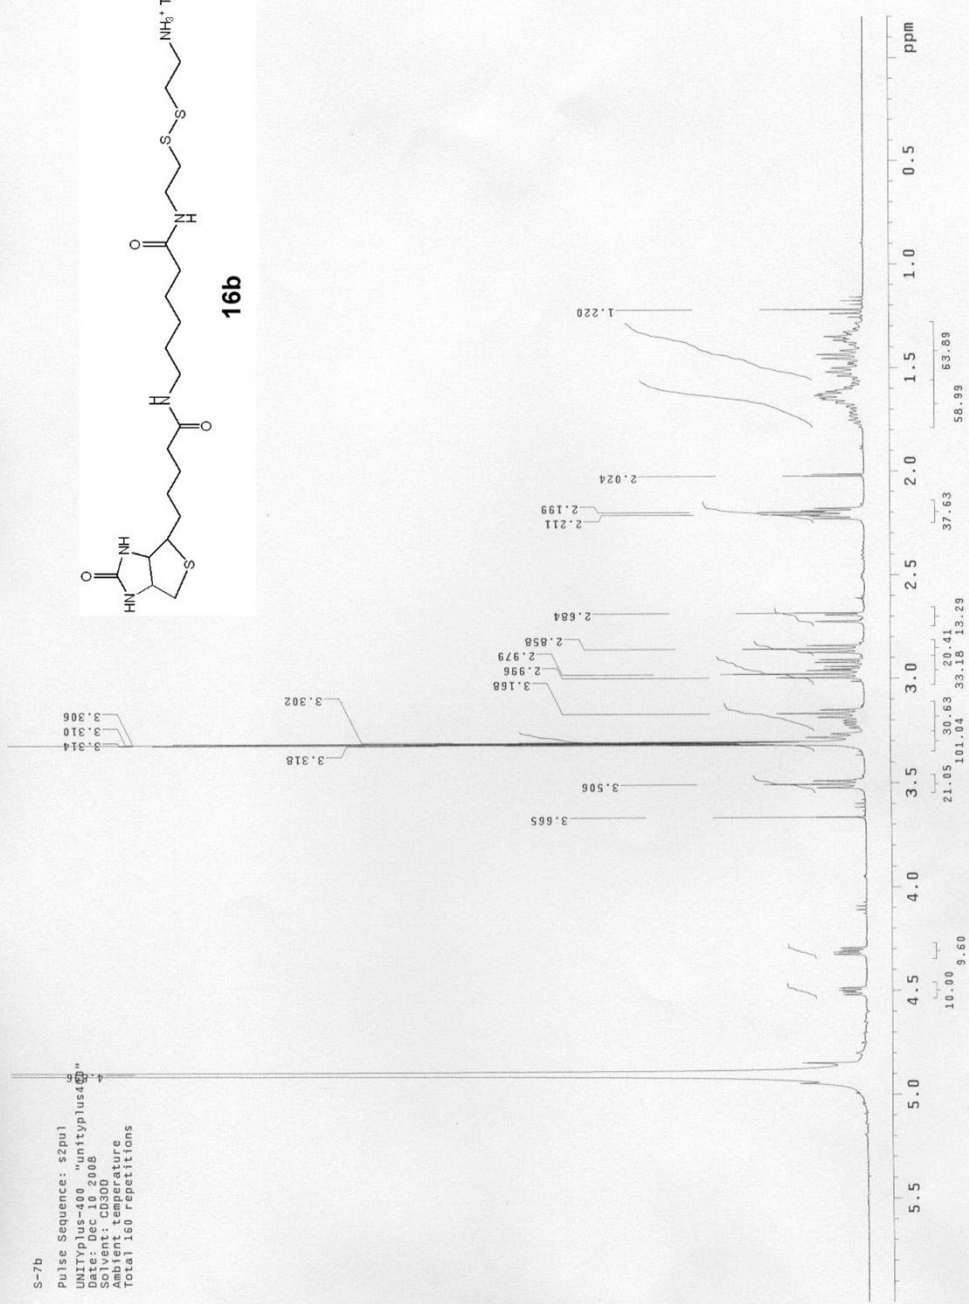

S-7b  
Pulse Sequence: s2pul  
UNITYplus-400 "unityplus400"  
Date: Dec 10 2008  
Solvent: CD300  
Ambient: temperature  
Total 13200 repetitions

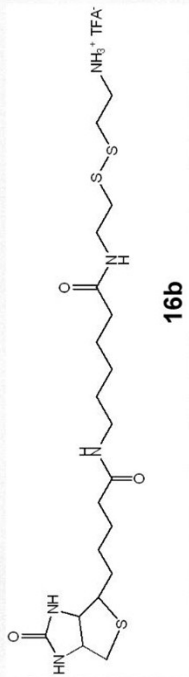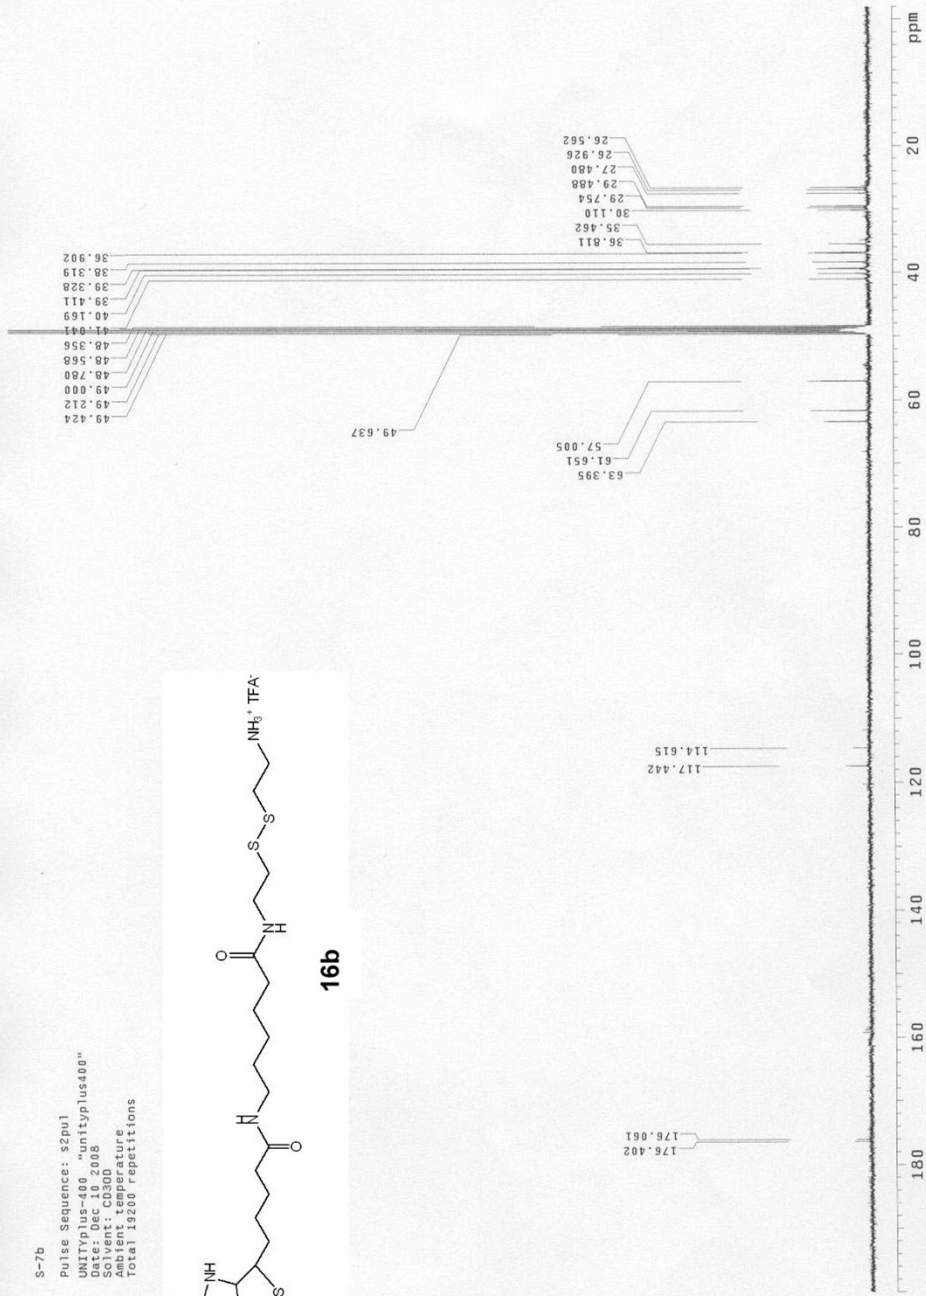



S-7b ESI+  
Molecular Formula : C<sub>20</sub>H<sub>38</sub>N<sub>5</sub>O<sub>3</sub>S<sub>3</sub>  
Exact Mass : 492.2137  
Measured Mass: 492.2135

492.2135

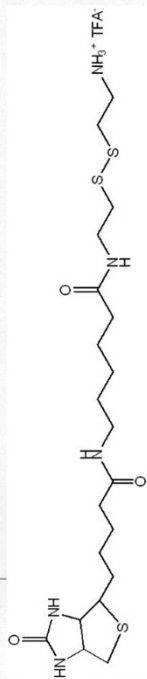

16b

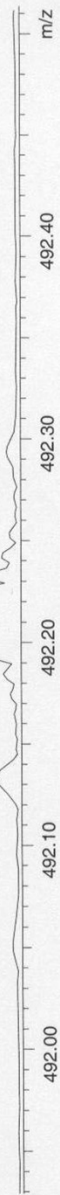

/d=/Data/yu/s7b/1/pdata/1 Administrator Mon Dec 1 17:04:01 2008

S-8  
Pulse Sequence: s2pu1  
UNITYplus-400 "unityplus400"  
Date: Jan 15 2009  
Solvent: CDCl3  
Temperature:  
Total 64 Repetitions

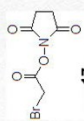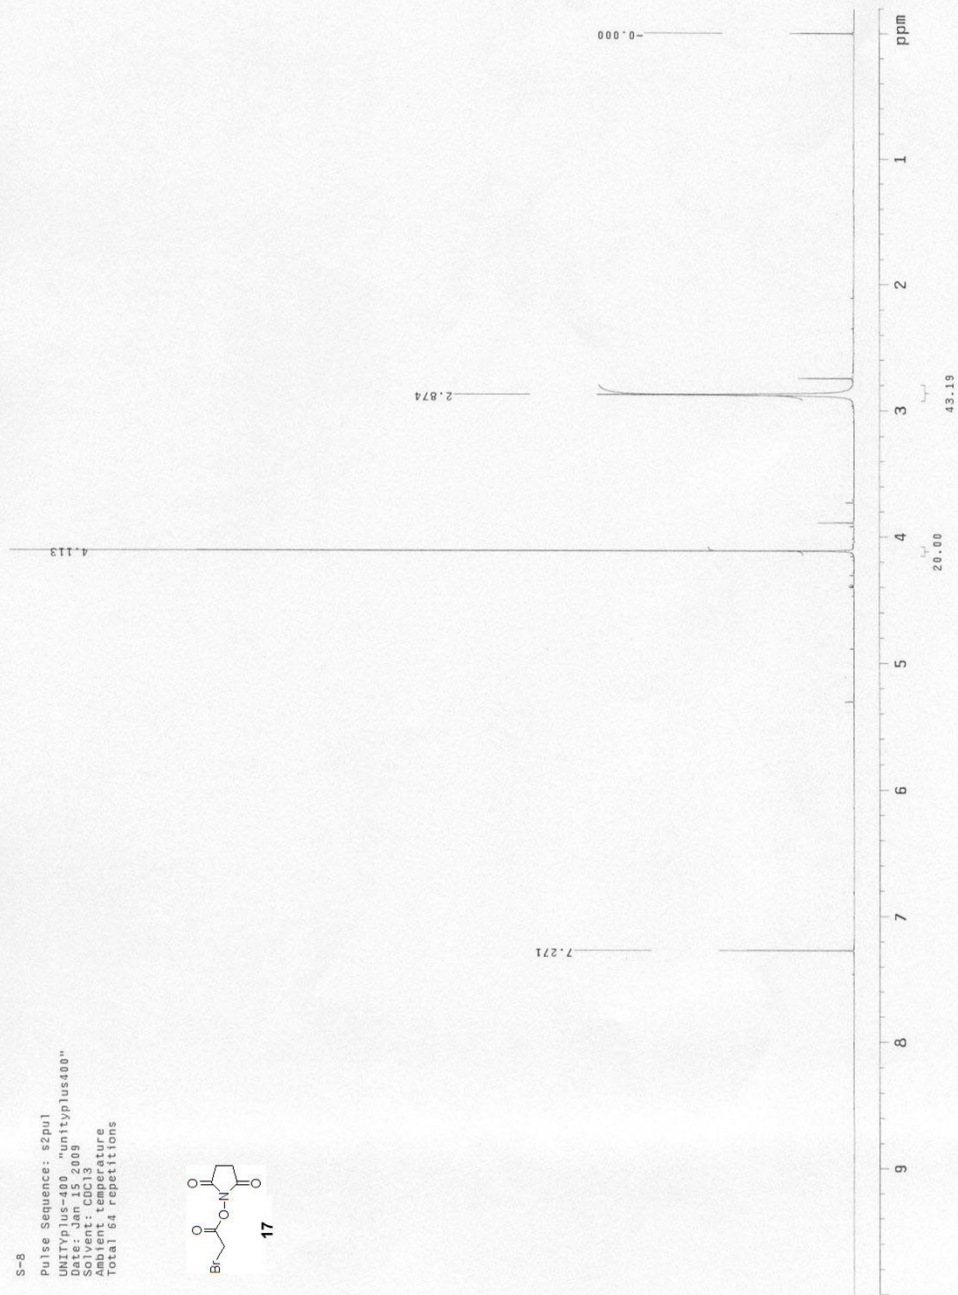

S-8

Pulse Sequence: s2pul  
UNITYplus-400 "unityplus400"  
Date: Jan 15, 2009  
Time: 10:00:00  
Ambient temperature  
Total 1184 repetitions

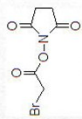

17

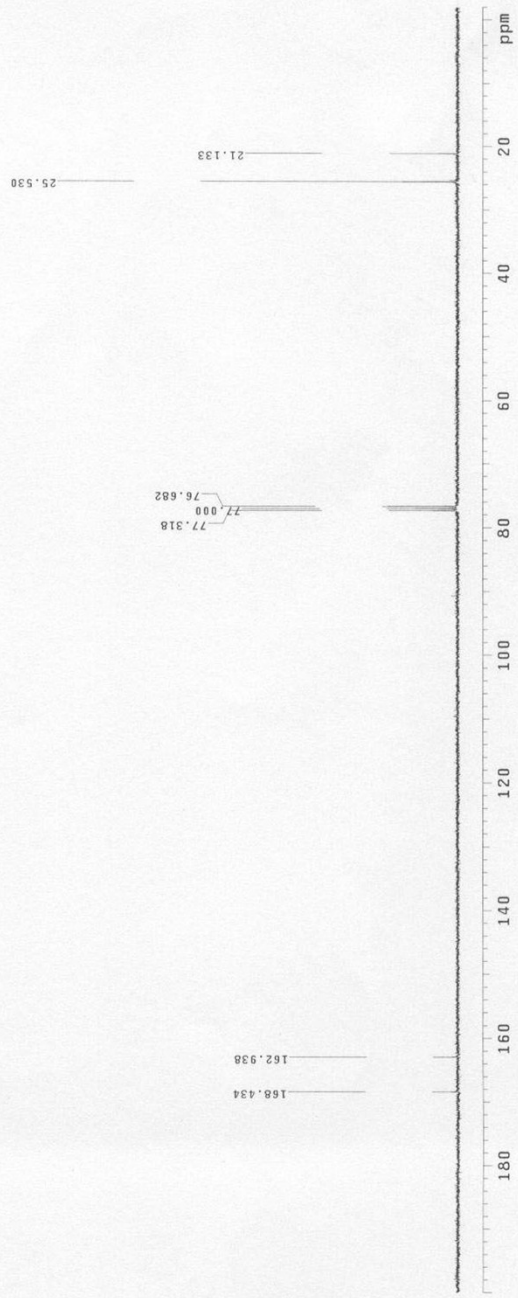

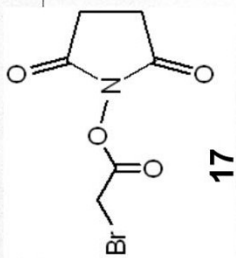

S-8 ESI+

Molecular Formula : C<sub>6</sub>H<sub>6</sub>O<sub>4</sub>NBrNa

Exact Mass : 257.9378

Measured Mass: 257.9380

257.9380

259.9358

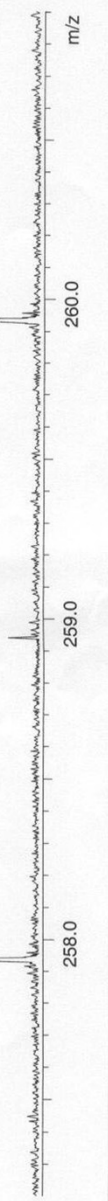

/d=/Data/yu/s8/1/pdata/1 Administrator Wed Jan 21 14:49:06 2009

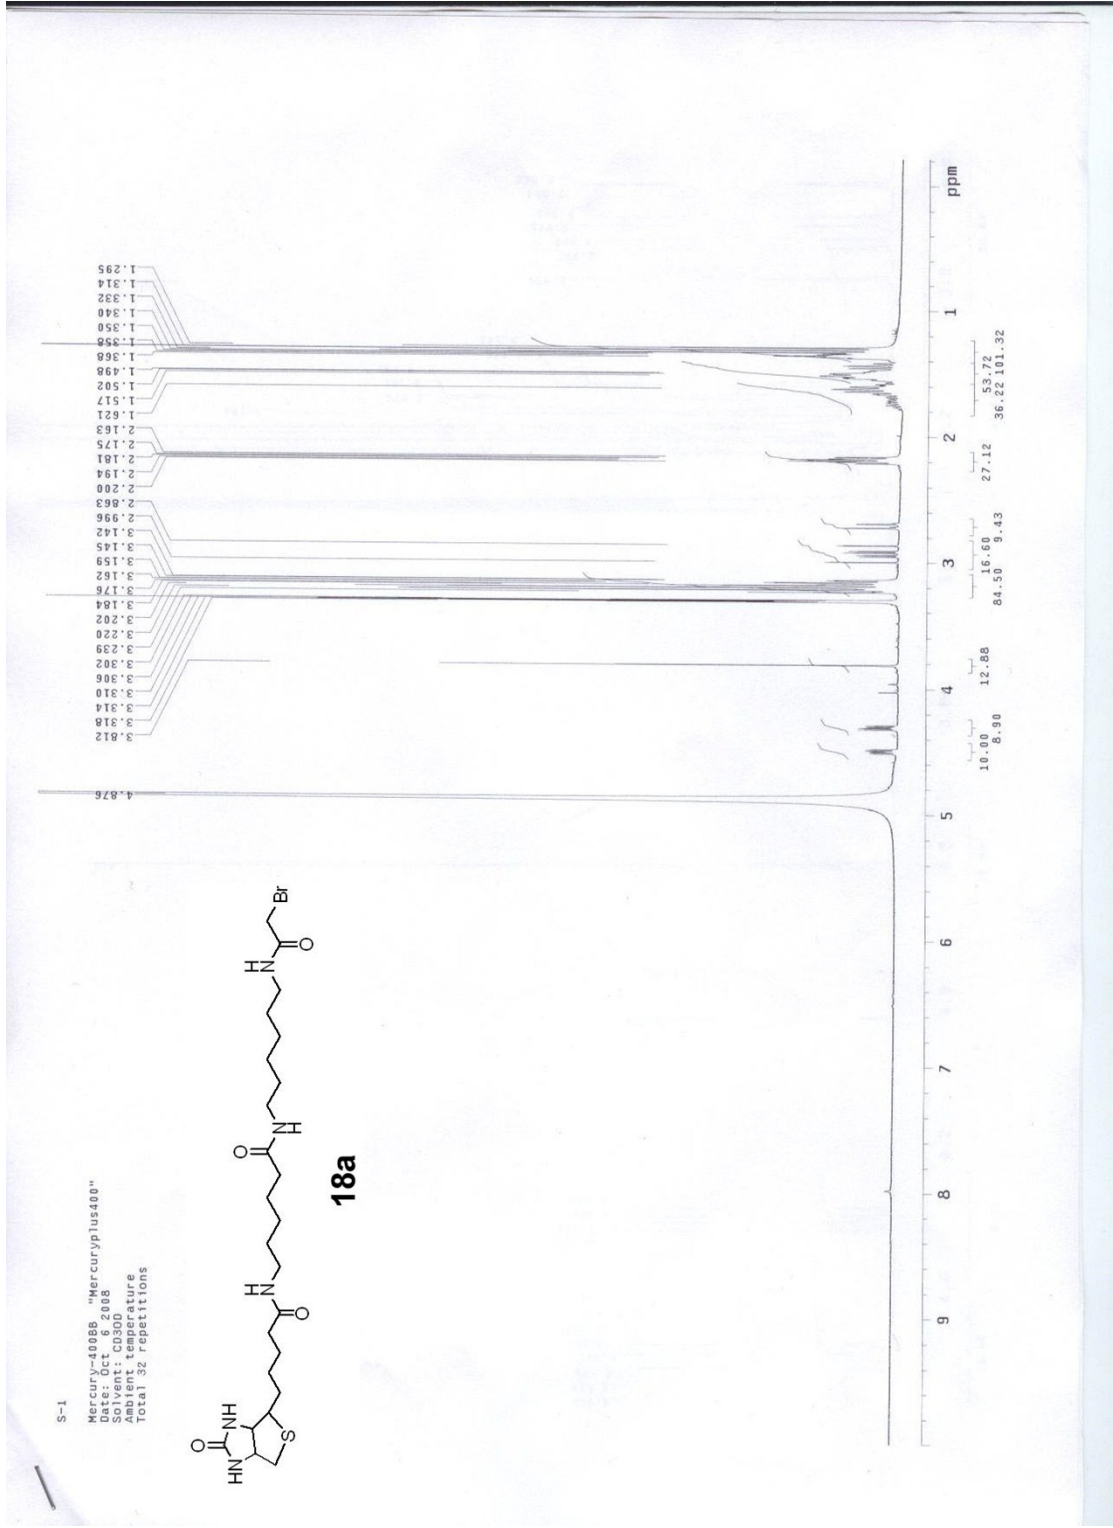

S-1

Mercury-400888 "Mercuryplus400"  
Date: Oct 6 2008  
Solvent: CD3OD  
Temperature: 30.00  
Total 19.200 Repetitions

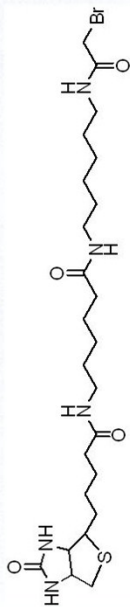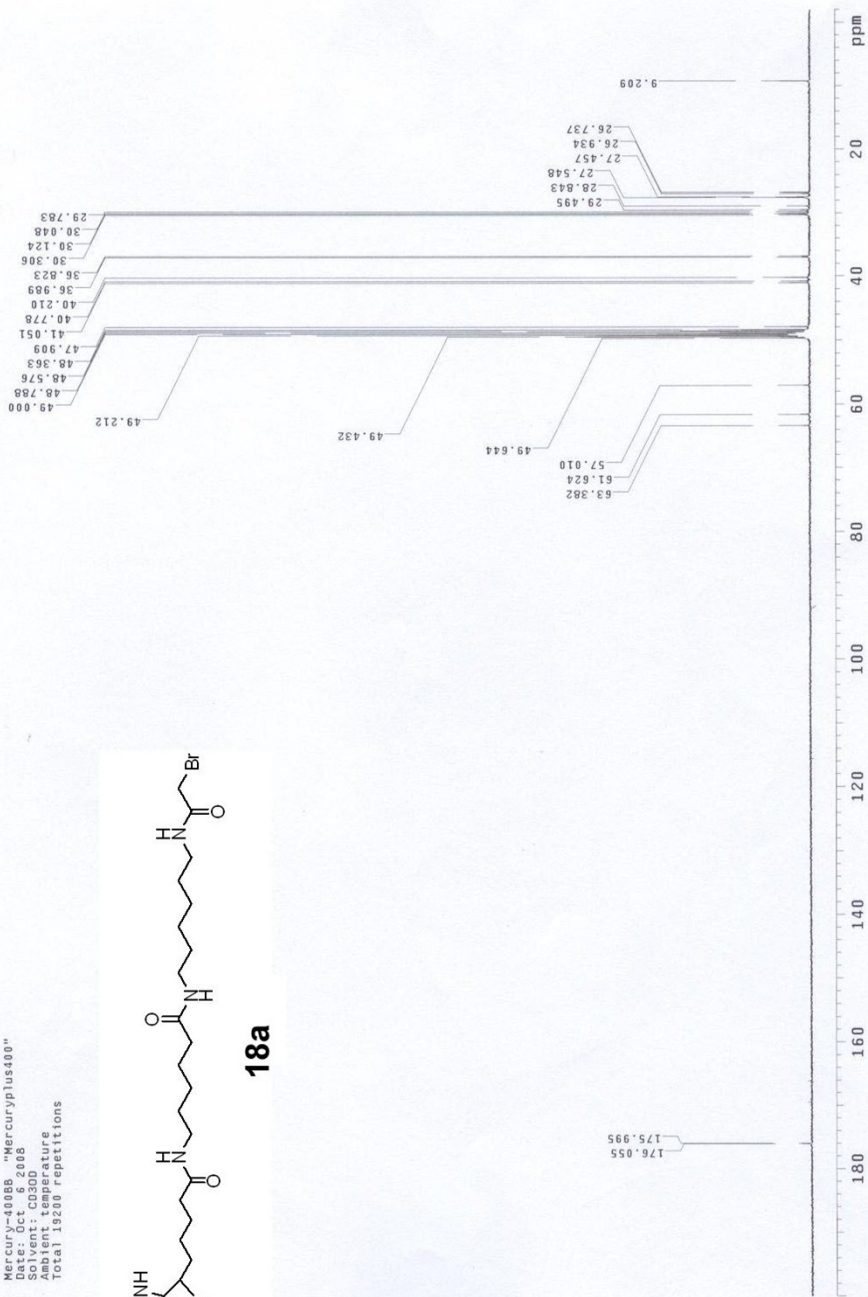







S-2

Pulse Sequence: szpul  
UNITYplus-400 "unityplus400"  
Date: Oct 09 2008  
Time: 10:00:00  
Ambient temperature  
Total 2096 Repetitions

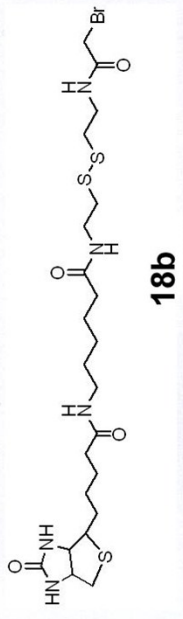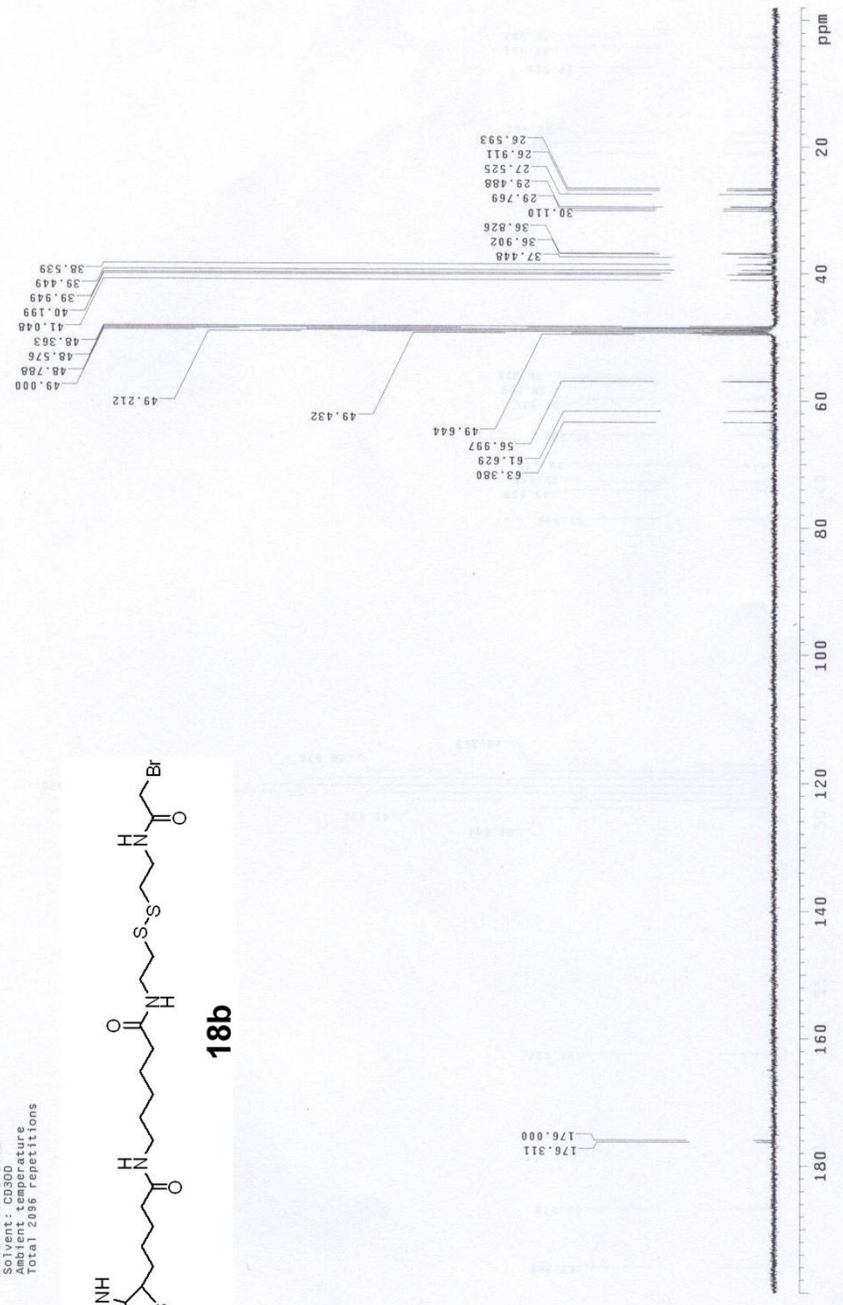

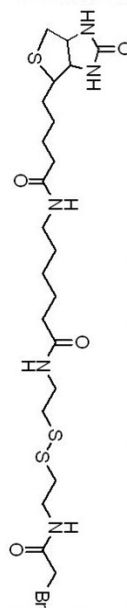

18b

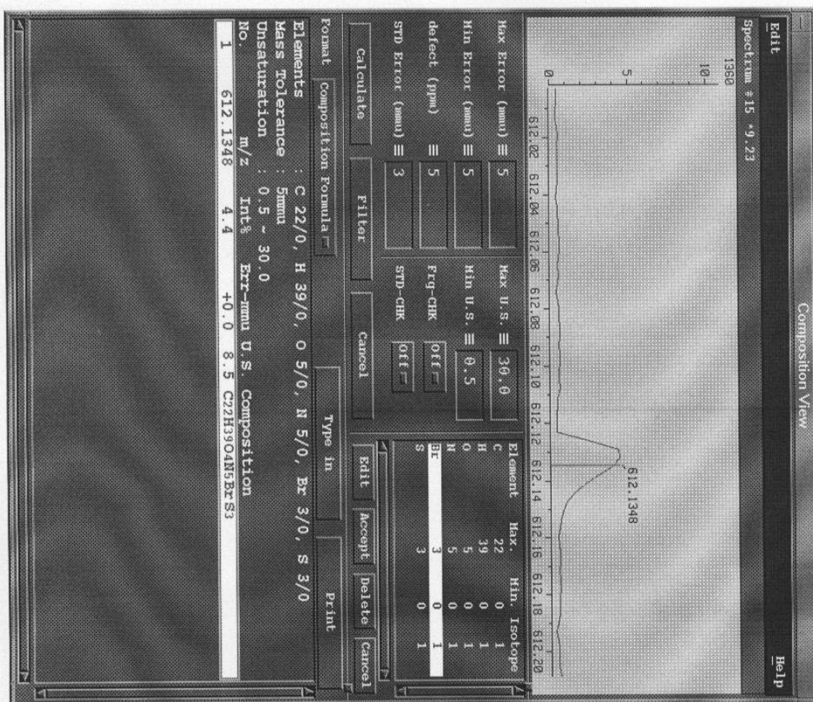

[ Theoretical Ion Distribution ]

Molecular Formula : C22 H39 O4 N5 Br S3

(m/z 612.1348, MW 613.6848, U.S. 8.5)

Base Peak : 614.1328, Averaged MW : 613.6814 (a), 613.6843 (w)

| m/z      | INT.           |
|----------|----------------|
| 612.1348 | 86.5444 *****  |
| 613.1375 | 25.4538 *****  |
| 614.1328 | 100.0000 ***** |
| 615.1353 | 28.5872 *****  |
| 616.1311 | 16.5450 *****  |
| 617.1326 | 3.9507 **      |
| 618.1298 | 1.1769 *       |
| 619.1305 | 0.2293         |
| 620.1291 | 0.0446         |
| 621.1294 | 0.0069         |
| 622.1292 | 0.0010         |
| 623.1297 | 0.0001         |
